# Supplementary material for: Aramid Nanofiber@Al2O3 Composite Aerogels toward Ultra-High Near Infrared Transmittance and Low Thermal Conductivity for Robust Passive Thermal Managements
Source: Research Square preprint supplement (doi:10.21203/rs.3.rs-7452796/v1), 2025-08-26
Supplement: Supplementary file 1 [file ae05b2047530962919649769.docx]

**Supporting Information**

**Aramid Nanofiber@Al2O3 Composite Aerogels toward Ultra-High Near Infrared Transmittance and Low Thermal Conductivity for Robust Passive Thermal Managements**

*Yanan Chen1,2*† *Sijia Ge2*† *Hong Li1,2 Ling Liu2,3 Xueyan Hu2,3 Peiying Hu4 Xiaodong Wu1* Sheng Cui1* and Jin Wang2,3**

1 College of Materials Science and Engineering, Nanjing Tech University, Nanjing 211816, P. R. China

2 Key Laboratory of Multifunctional Nanomaterials and Smart Systems, Suzhou Institute of Nano-Tech and Nano-Bionics, Chinese Academy of Sciences, Suzhou 215123, P. R. China

3 School of Nano-Tech and Nano-Bionics, University of Science and Technology of China, Hefei 230026, P. R. China

4 State Key Laboratory of New Textile Materials and Advanced Processing, Wuhan Textile University, Wuhan 430200, P.R. China

† These authors contributed equally to this work.

*Corresponding author

Email: [wuxiaodong@njtech.edu.cn](mailto:wuxiaodong@njtech.edu.cn), [scui@njtech.edu.cn](mailto:scui@njtech.edu.cn), [jwang2014@sinano.ac.cn](mailto:jwang2014@sinano.ac.cn)

**1. Supporting Figures**


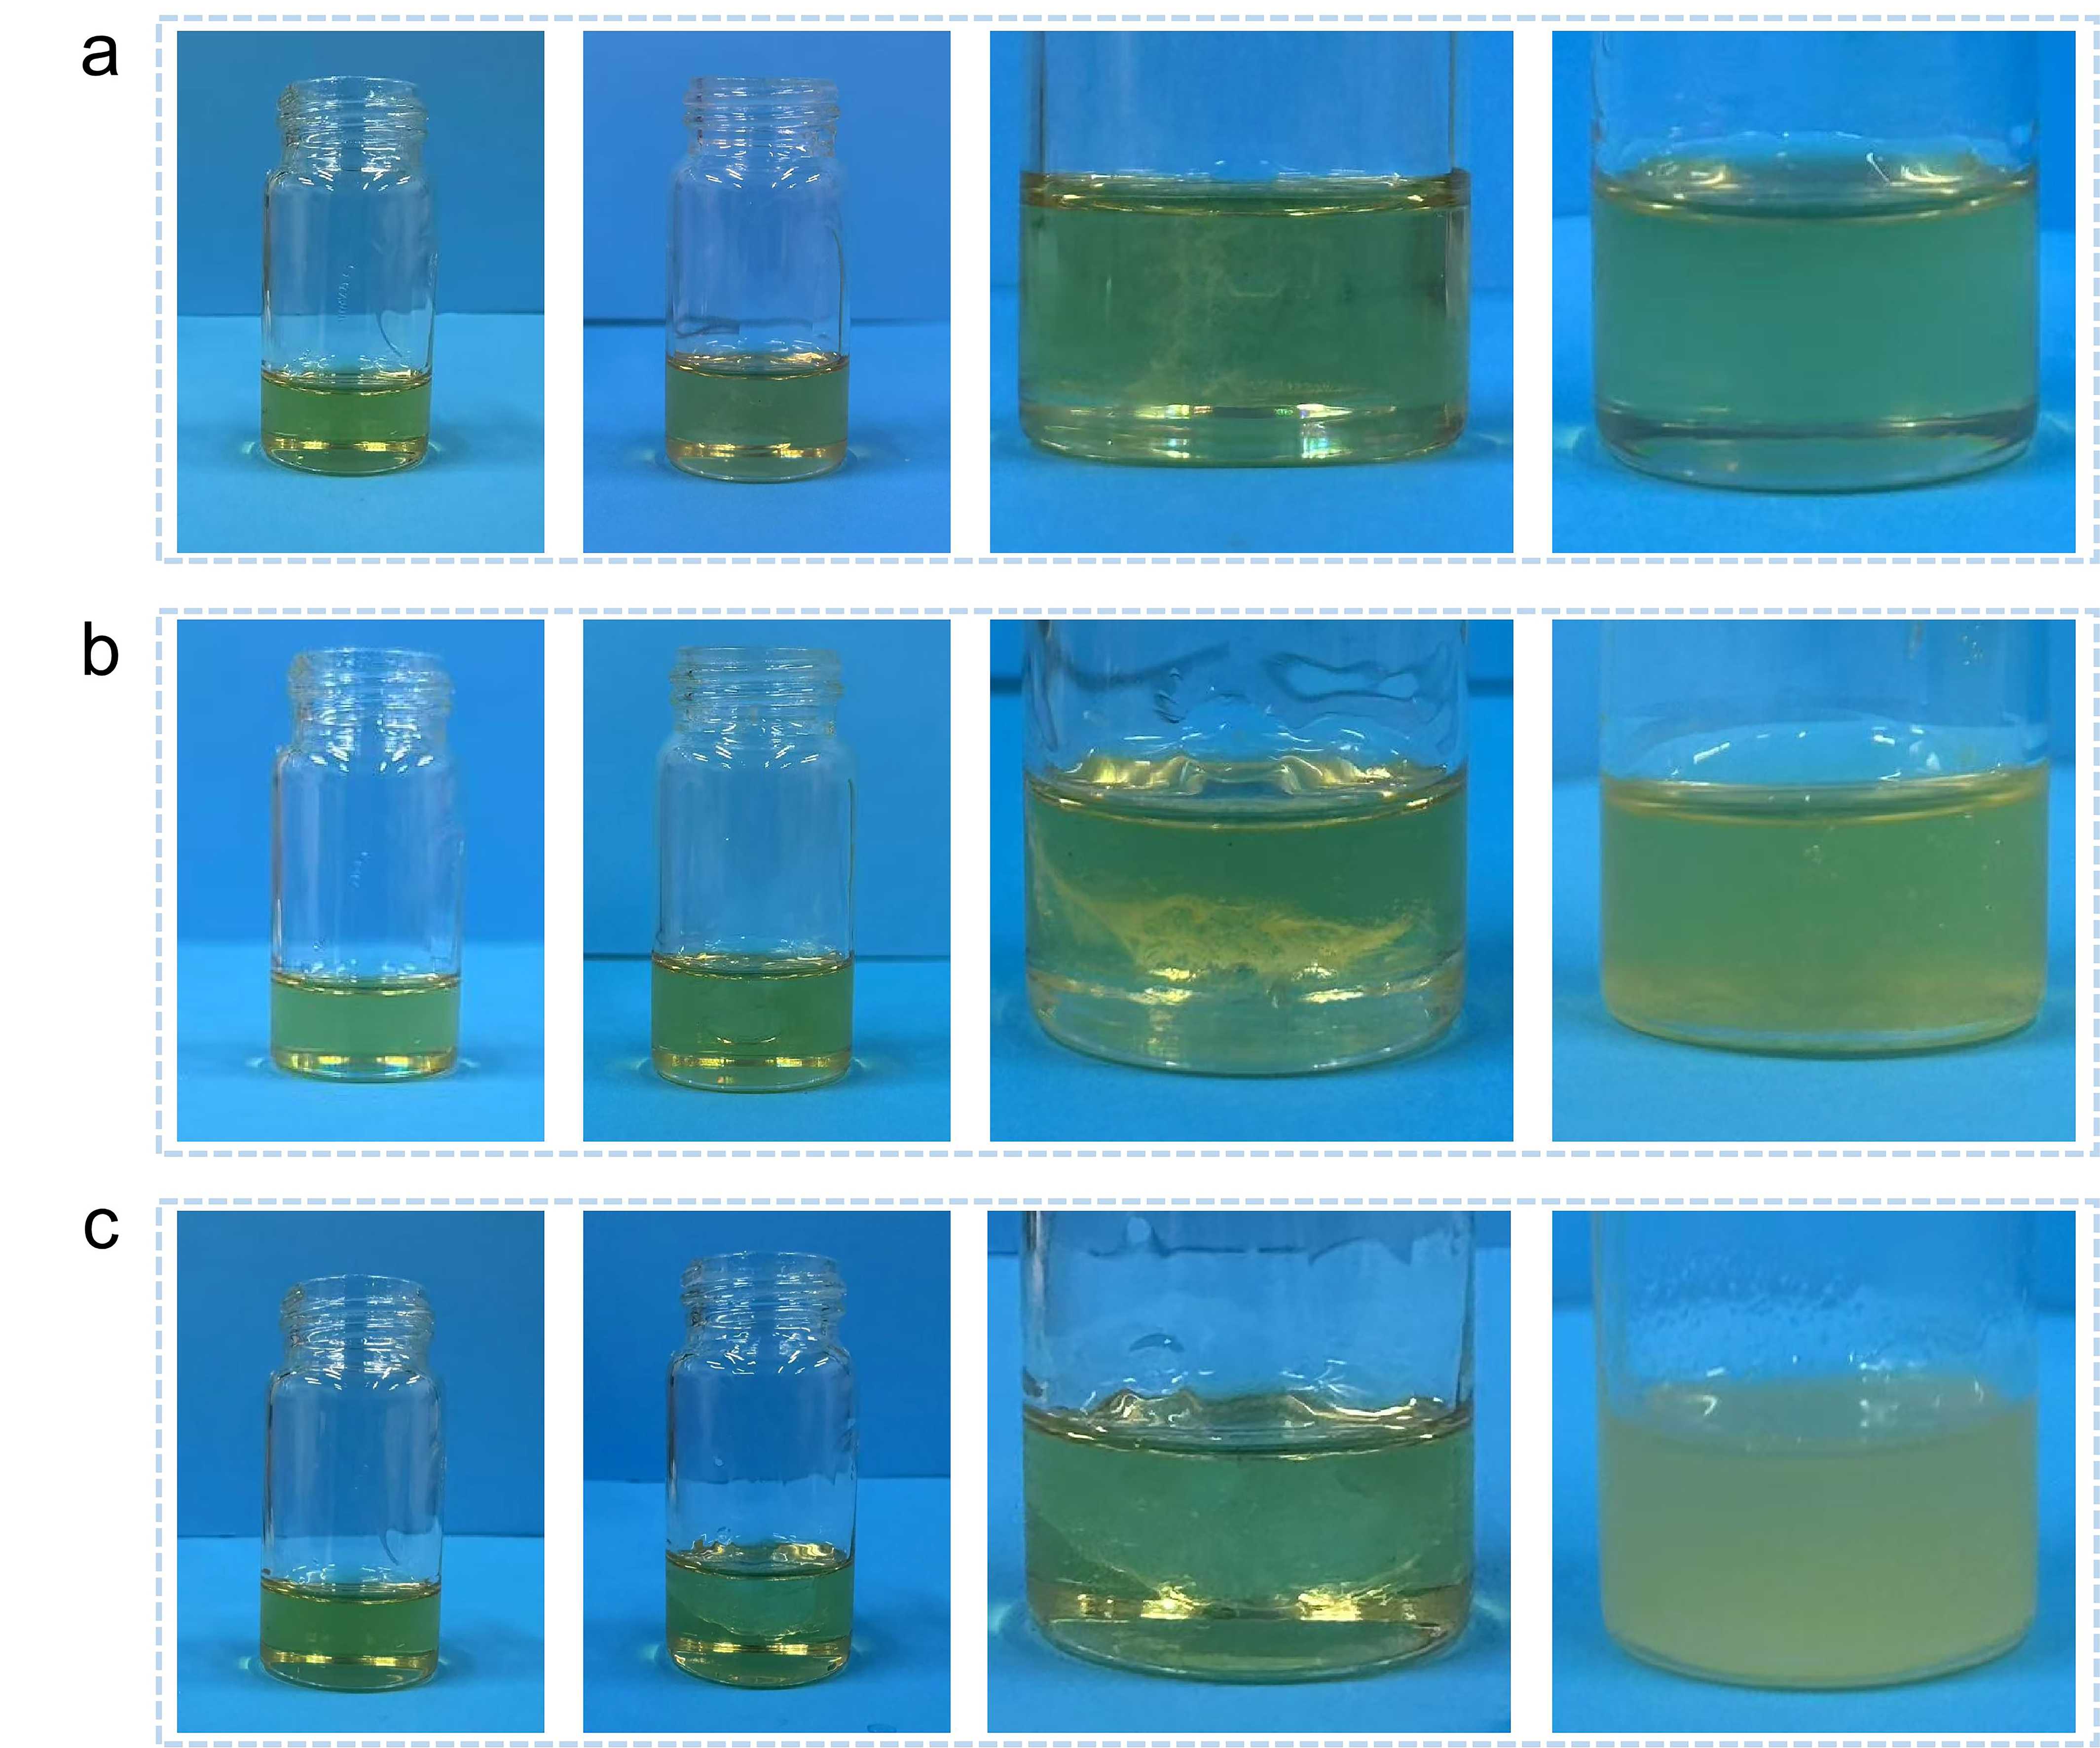


**Fig. S1** **a** Clear phase separation observed prior to stirring, and a homogeneous system is formed after stirring; **b** Mild phase separation persists after stirring; **c** Pronounced phase separation remains evident post-stirring


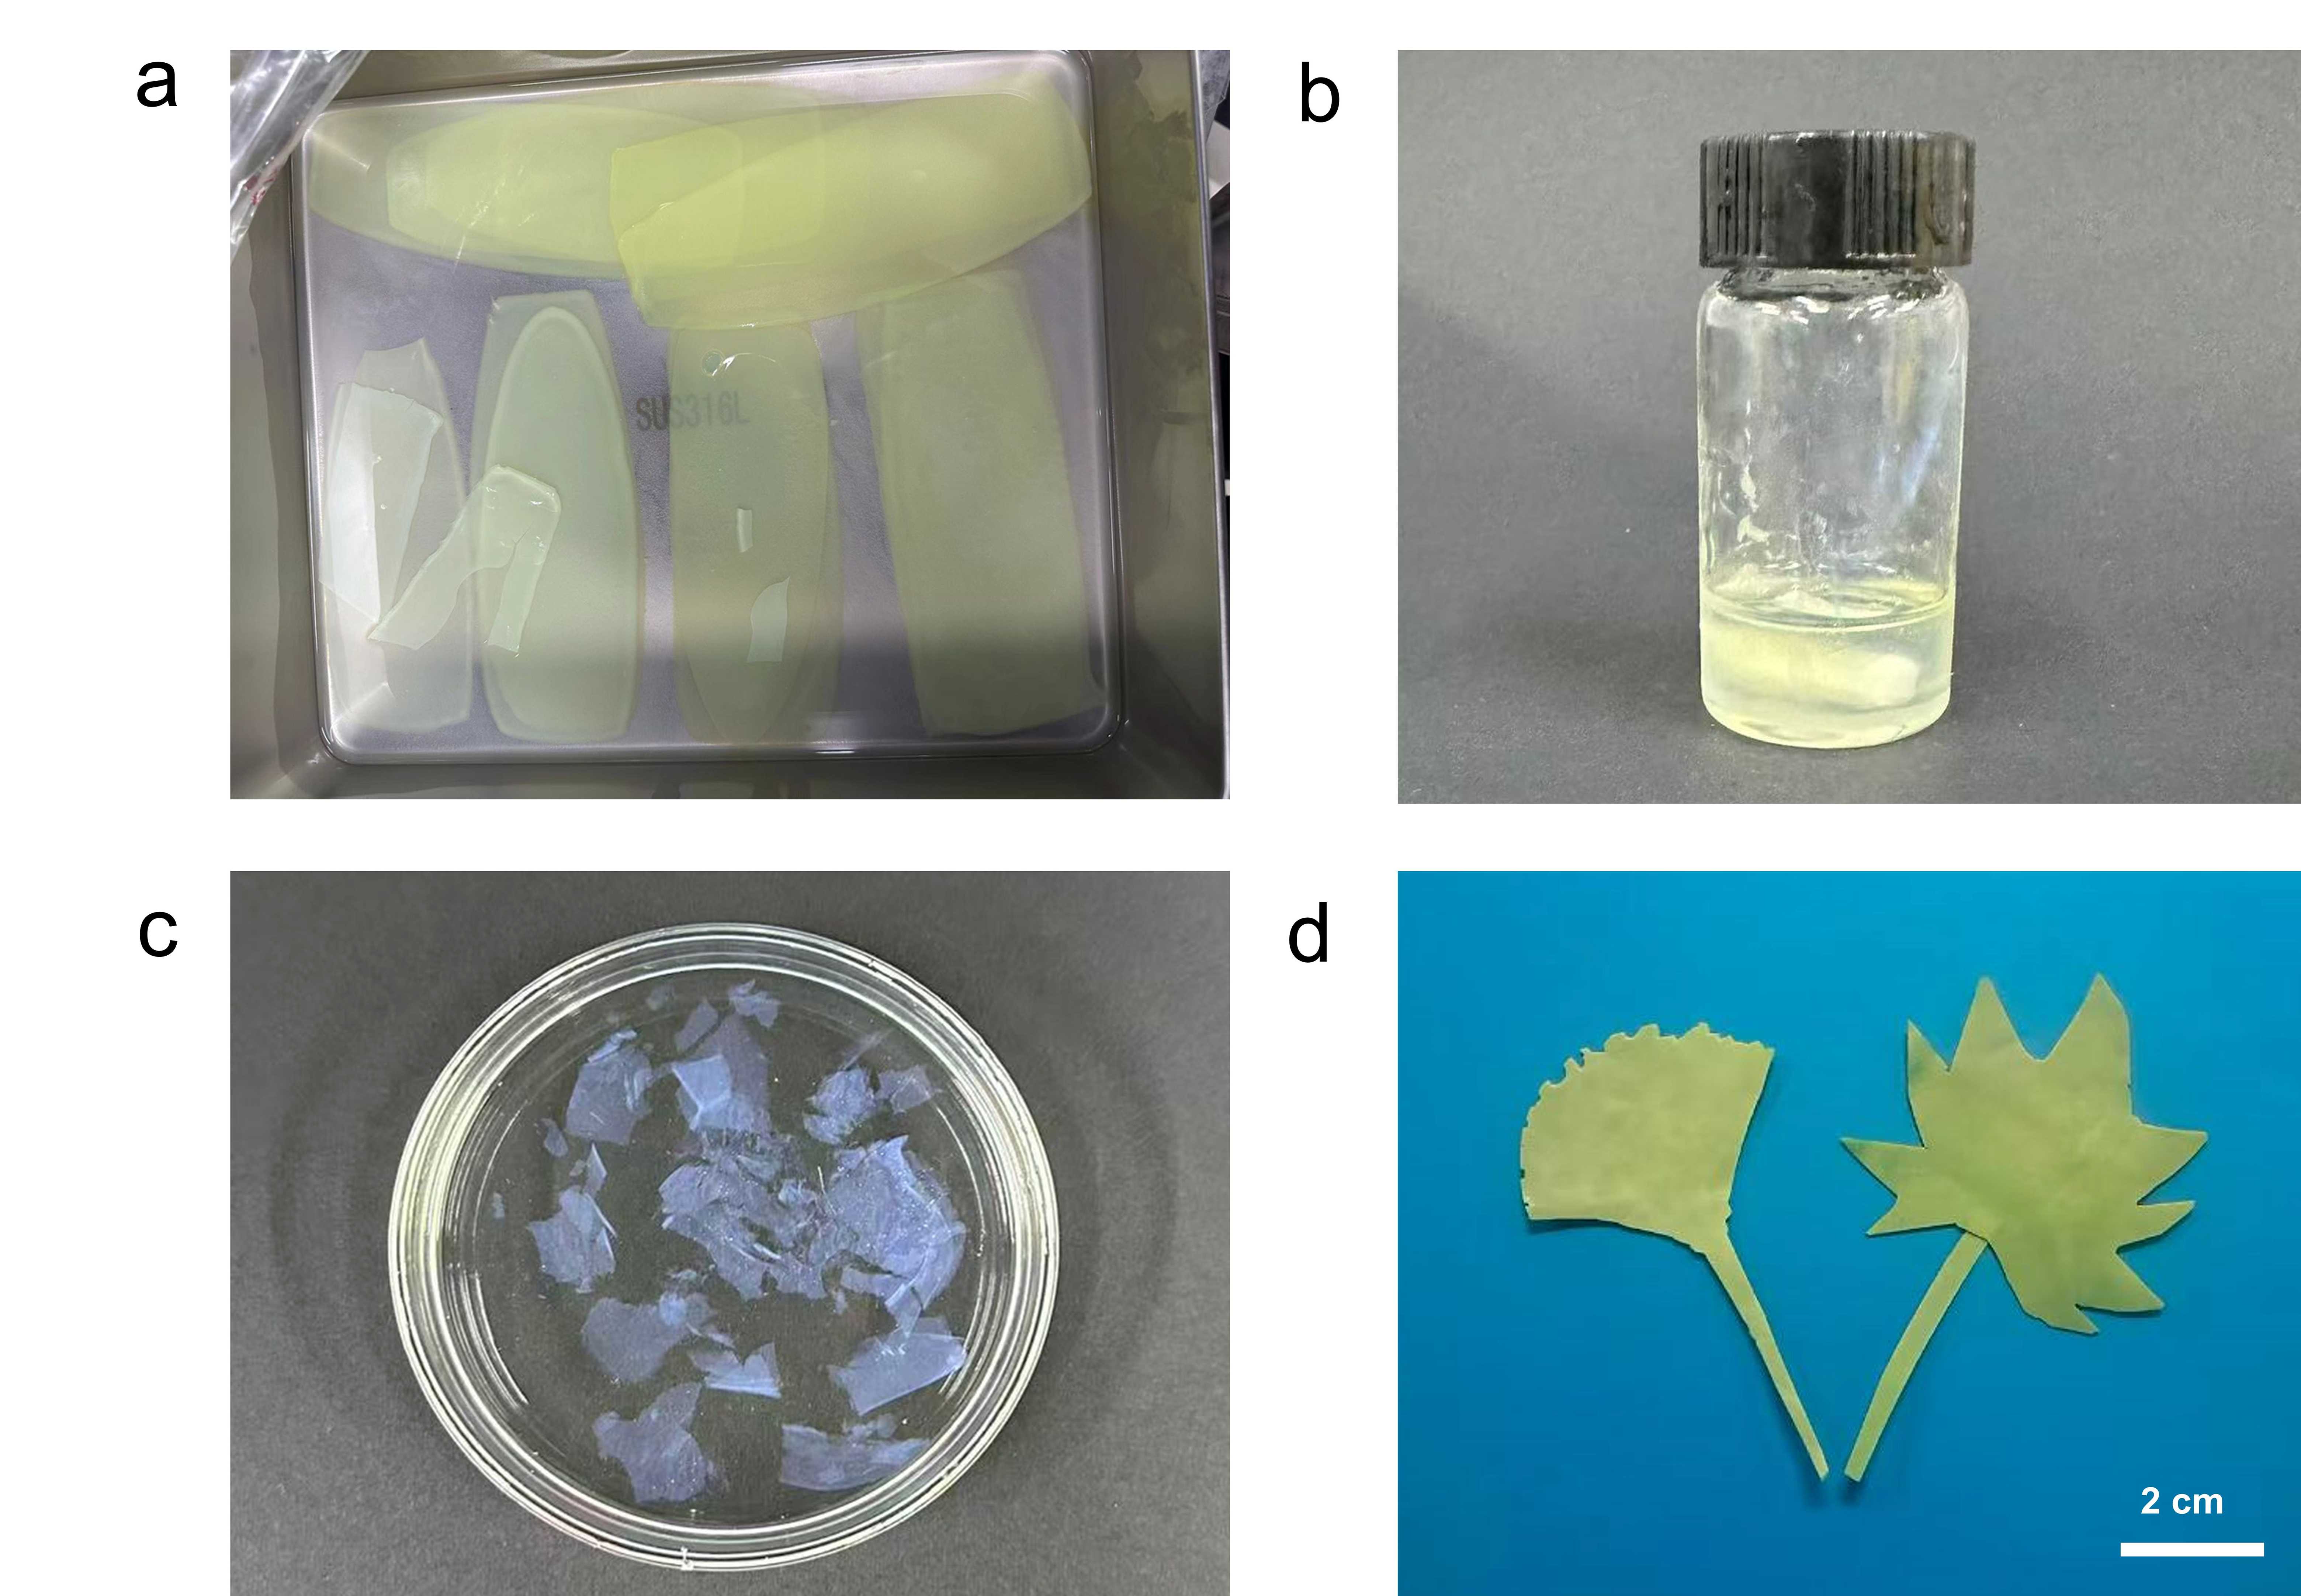


**Fig. S2** **a** Photo image of ANF@Al2O3 aging in PO; **b** Mixture of ANF and Al sol at a higher Al2O3 ratio after thorough stirring; **c** Gel obtained from b, which was severely fragmented and failed to form a monolithic structure; **d** Photo image of ANF@Al2O3 cut into the shapes of ginkgo leaves and phoenix tree leaves


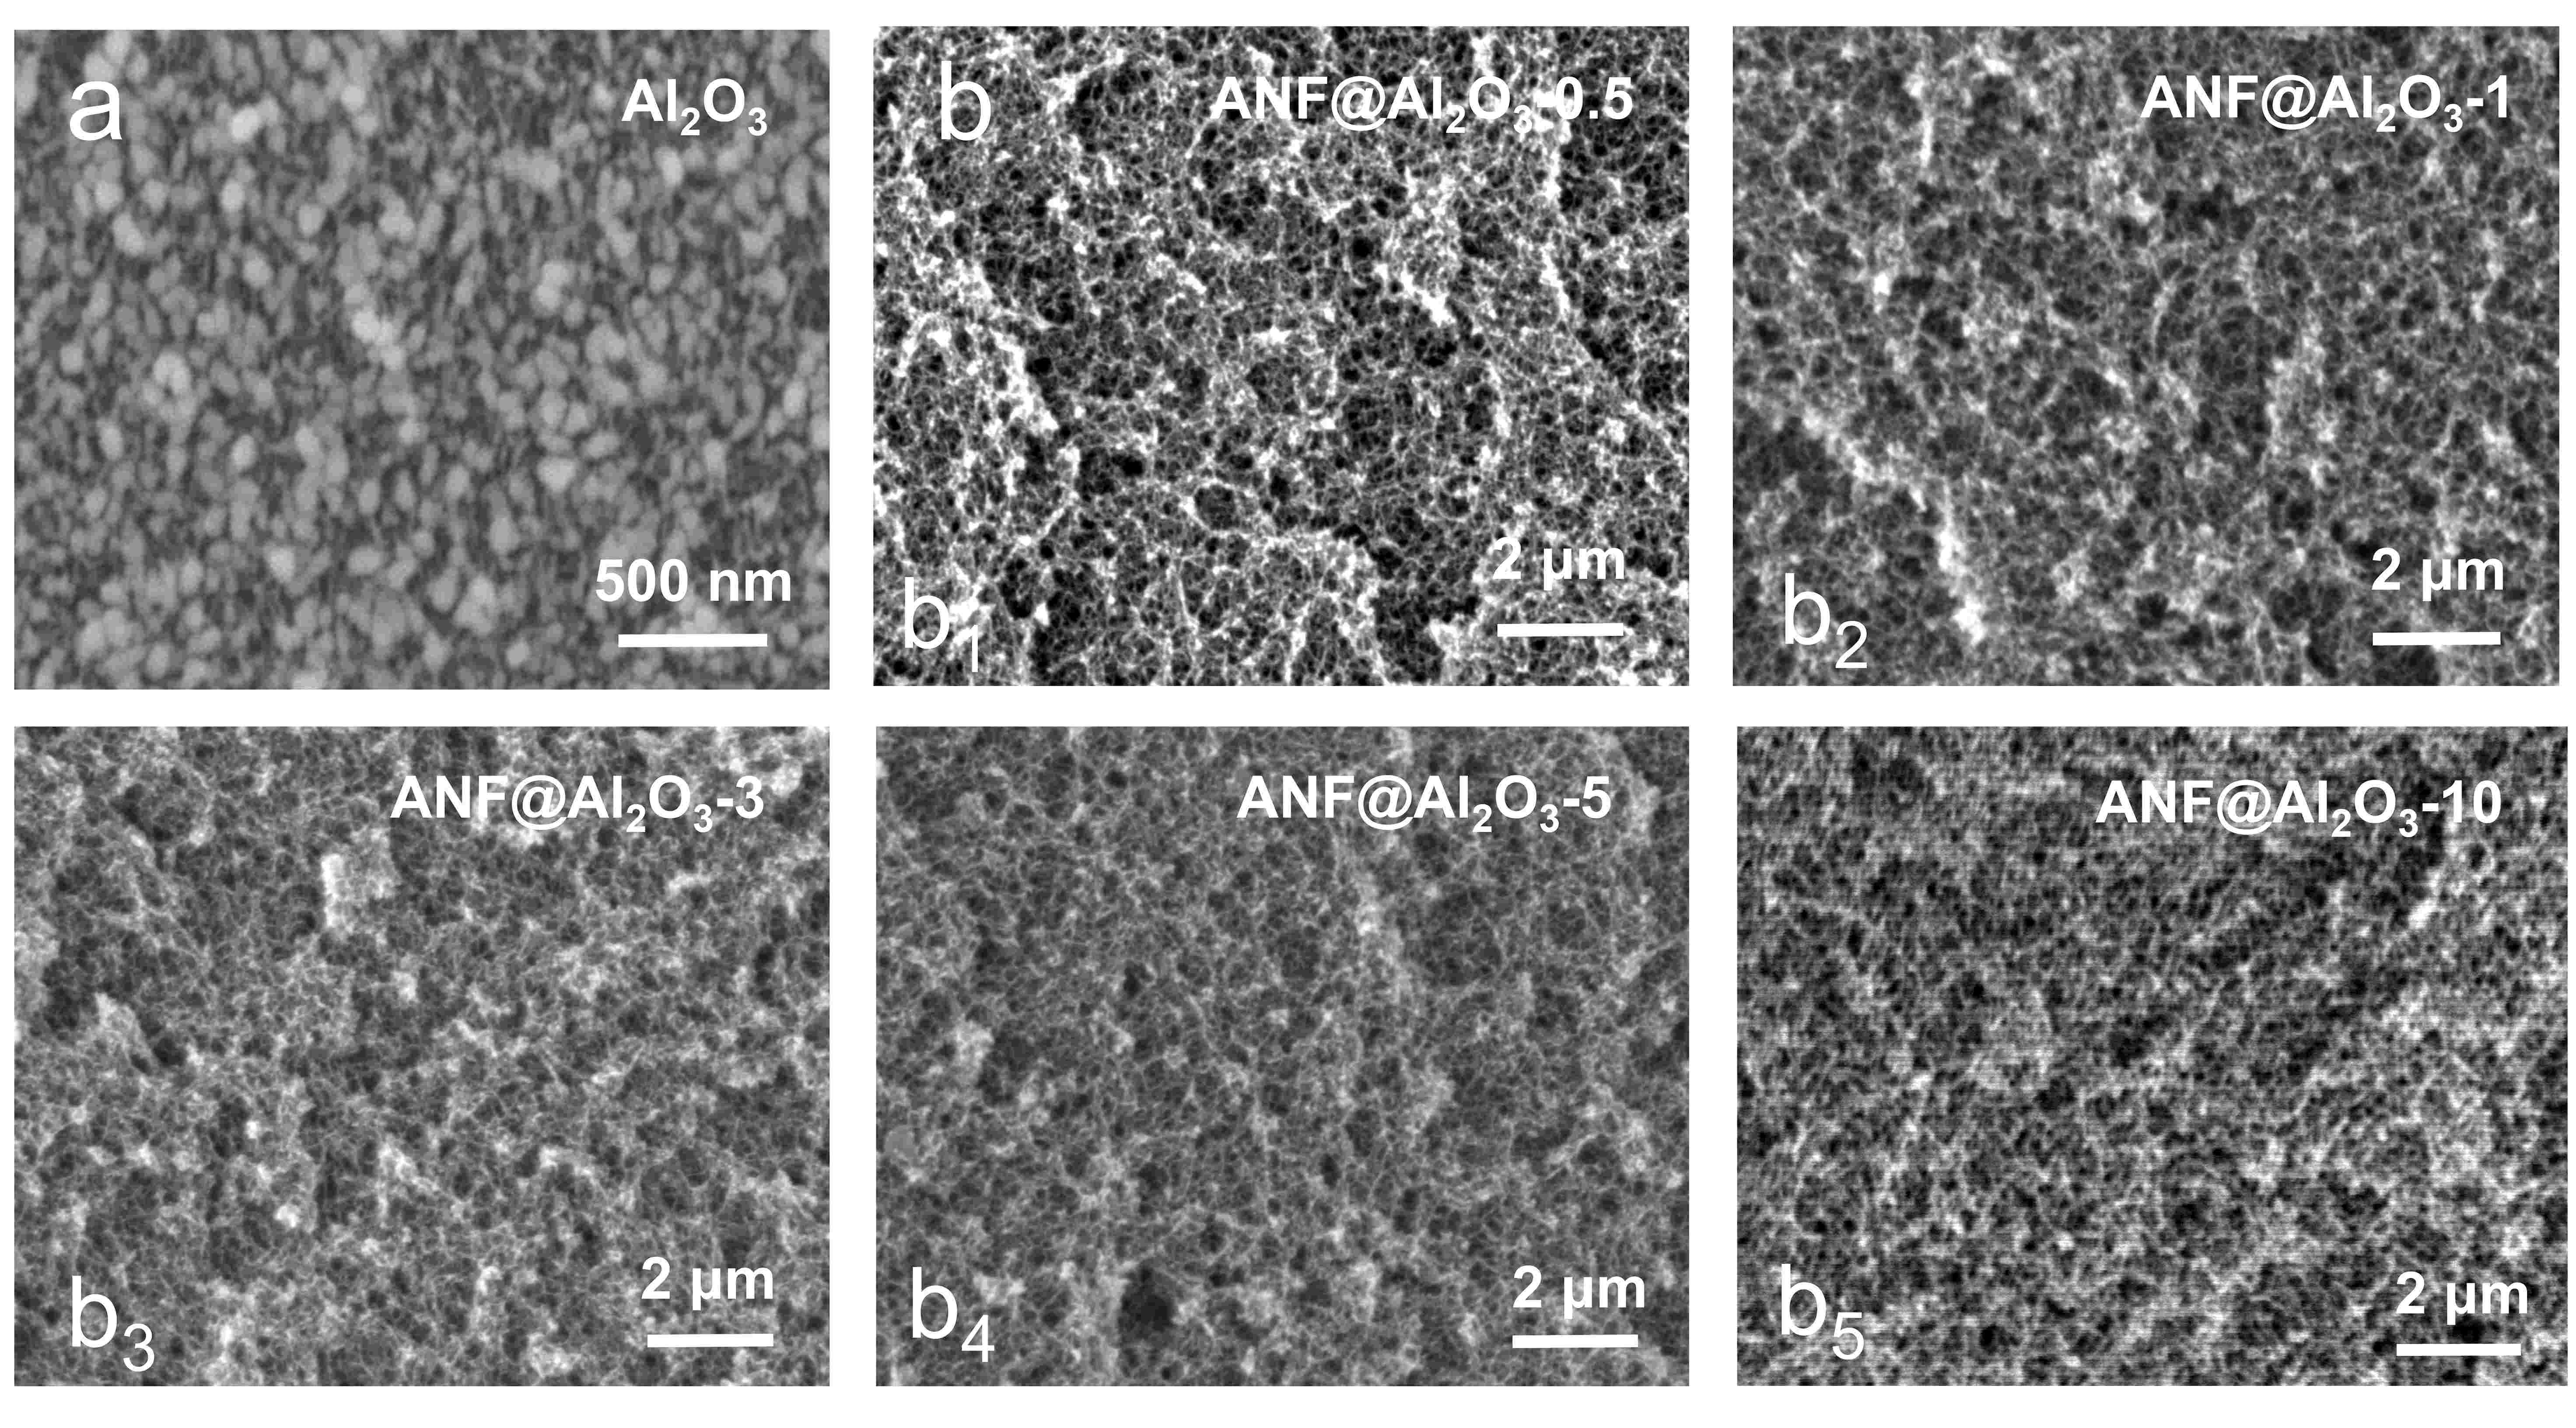


**Fig. S3** SEM images of **a** Al2O3 aerogel and **b** ANF@Al2O3 aerogels as indicated


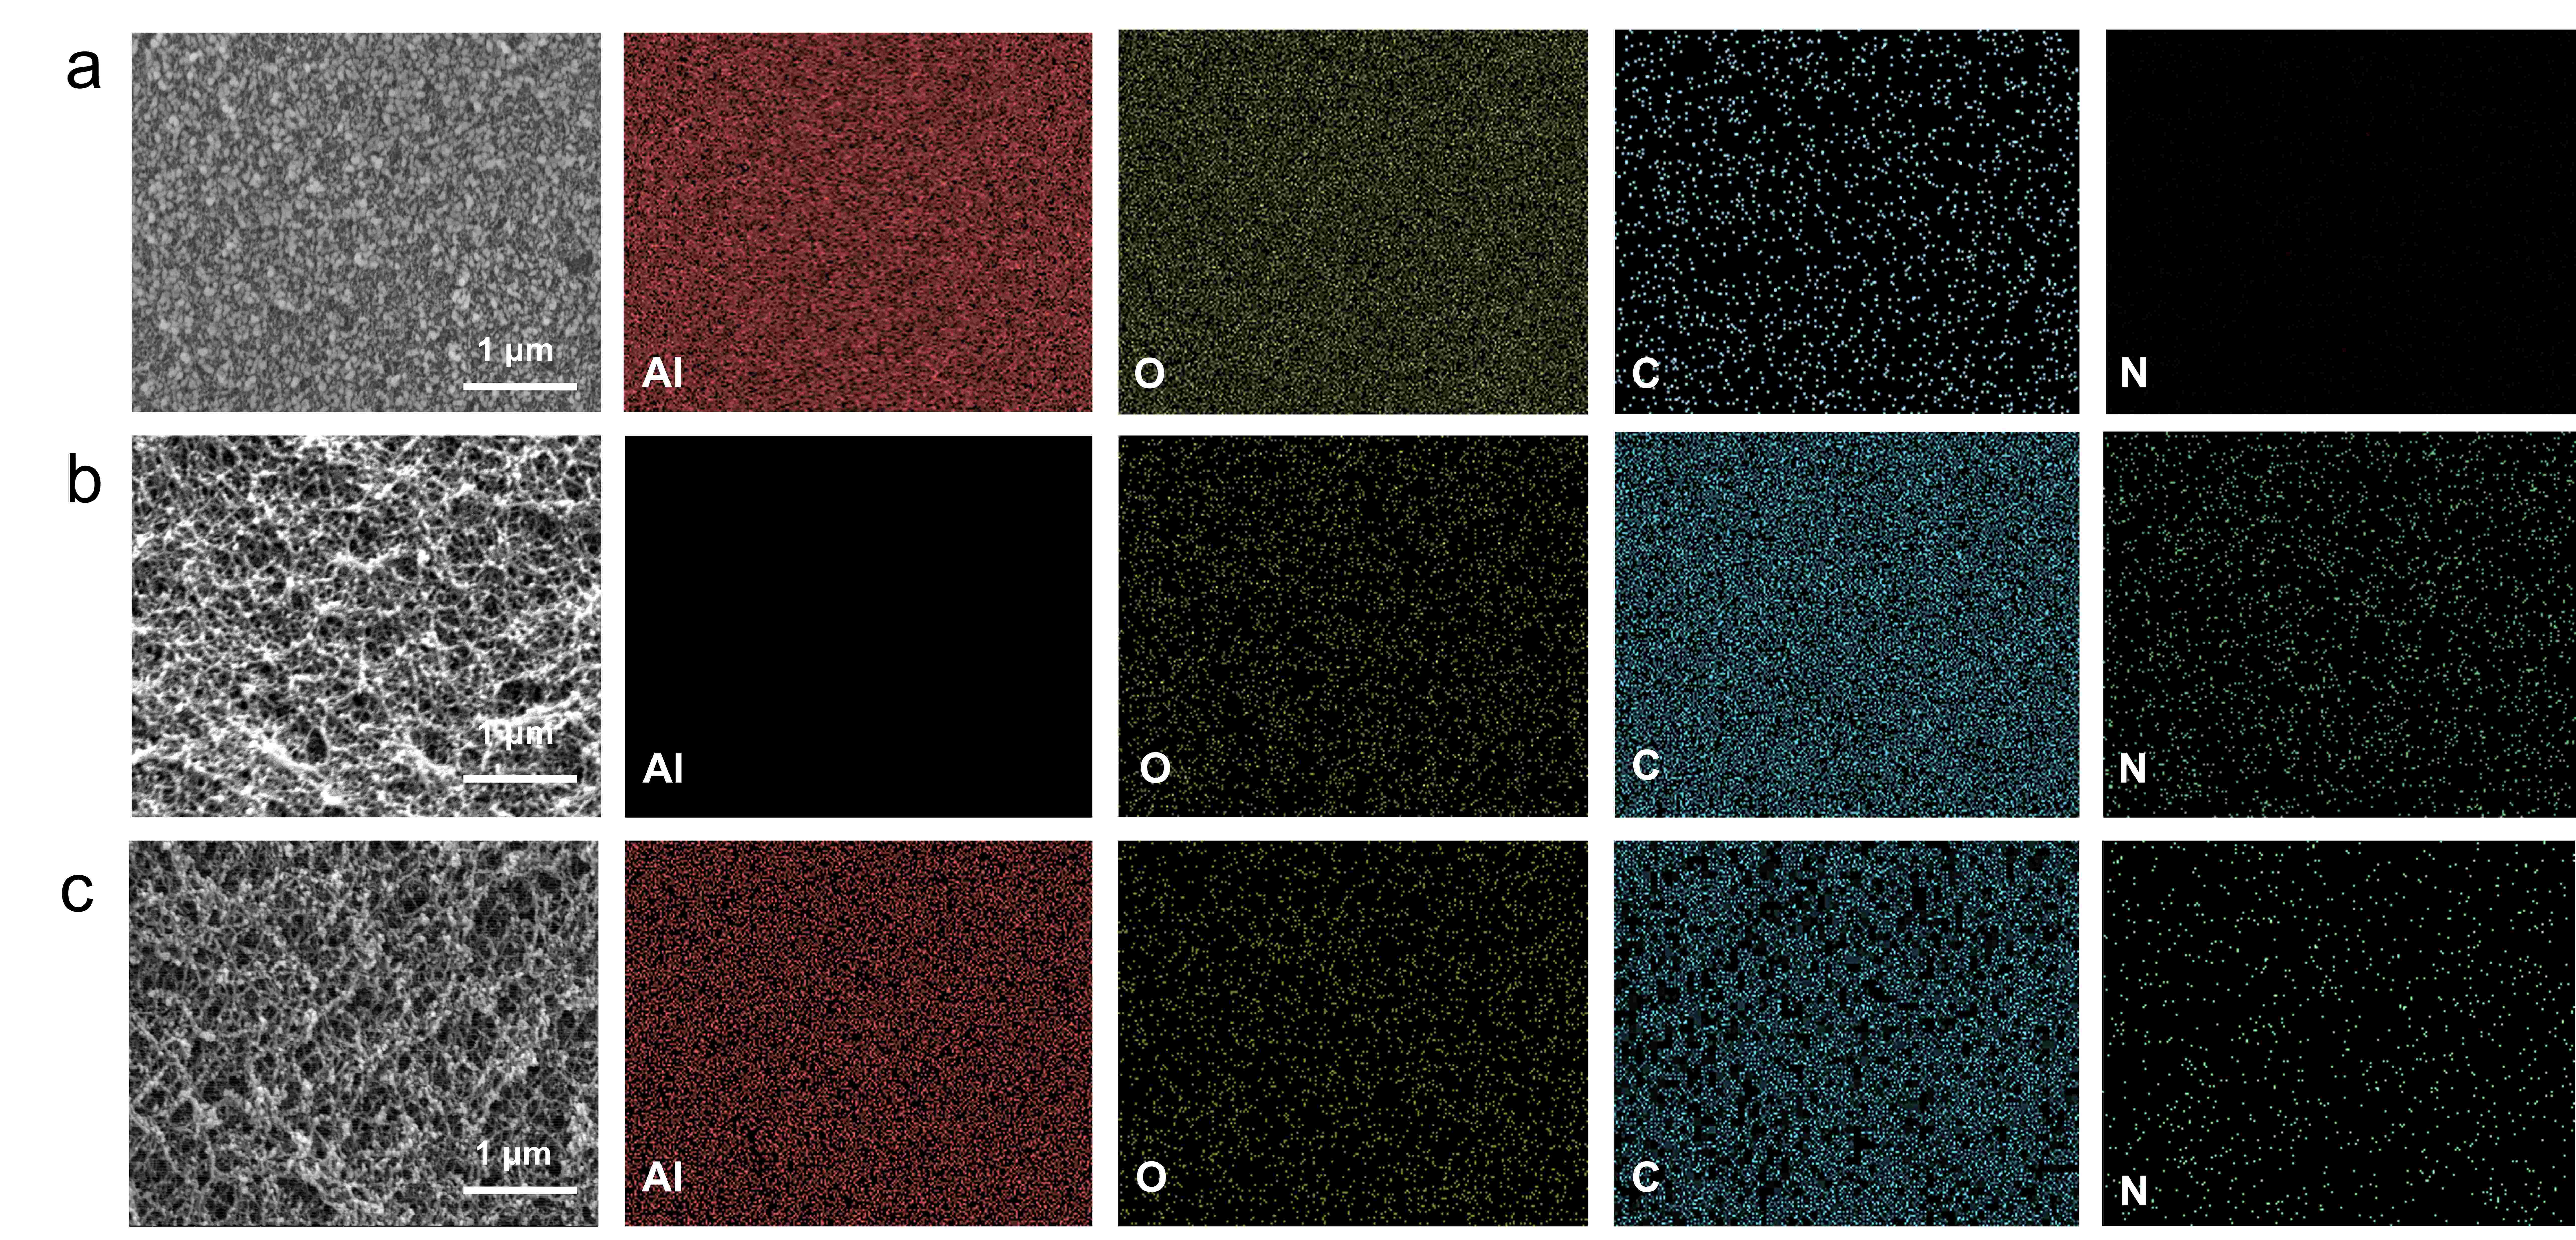


**Fig. S4** EDS mapping images of **a** Al2O3, **b** ANF and **c** ANF@Al2O3-10


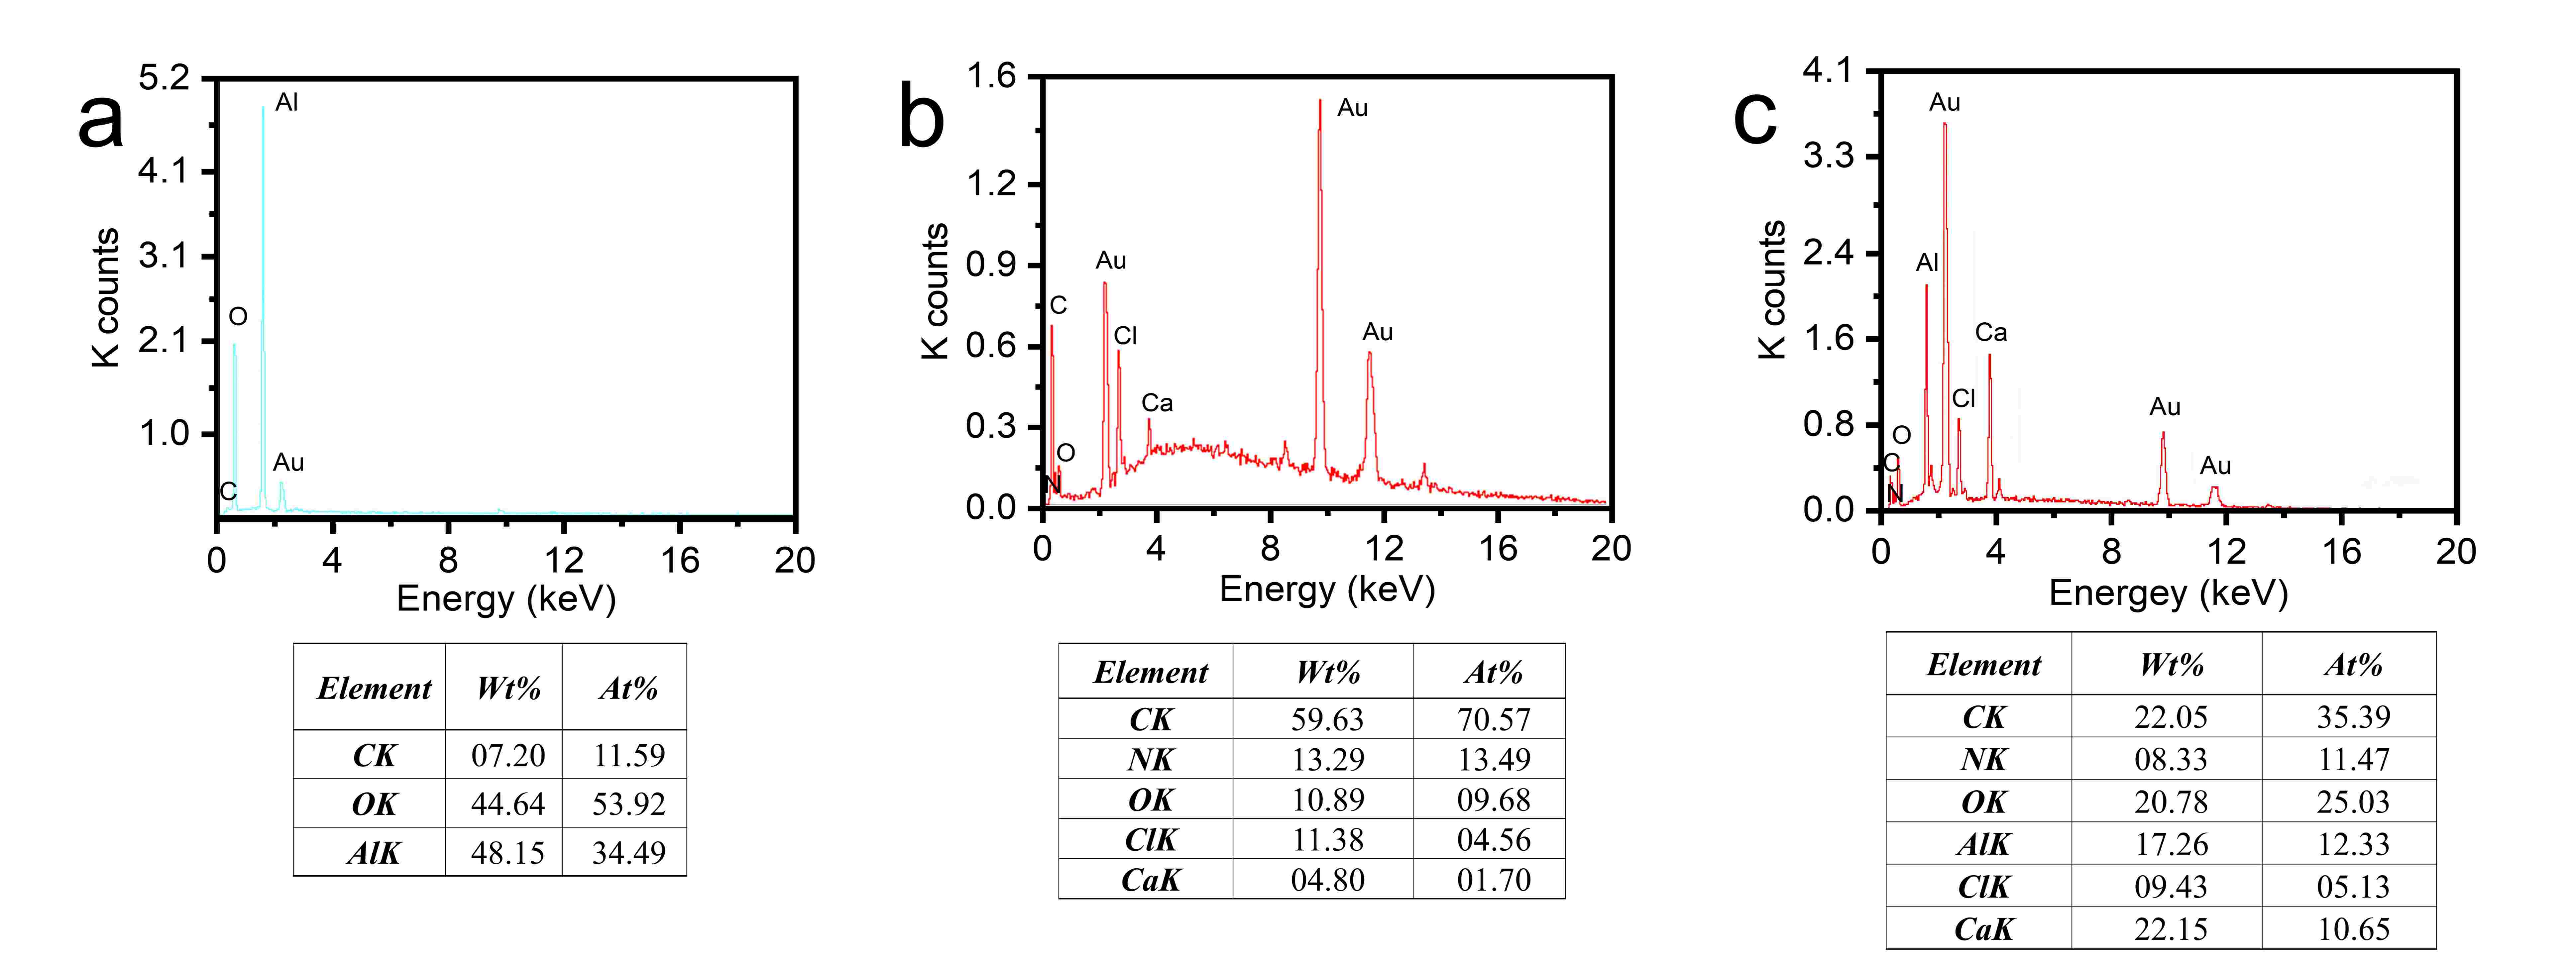


**Fig. S5** EDS spectra of **a** Al2O3, **b** ANF, and **c** ANF@Al2O3-10


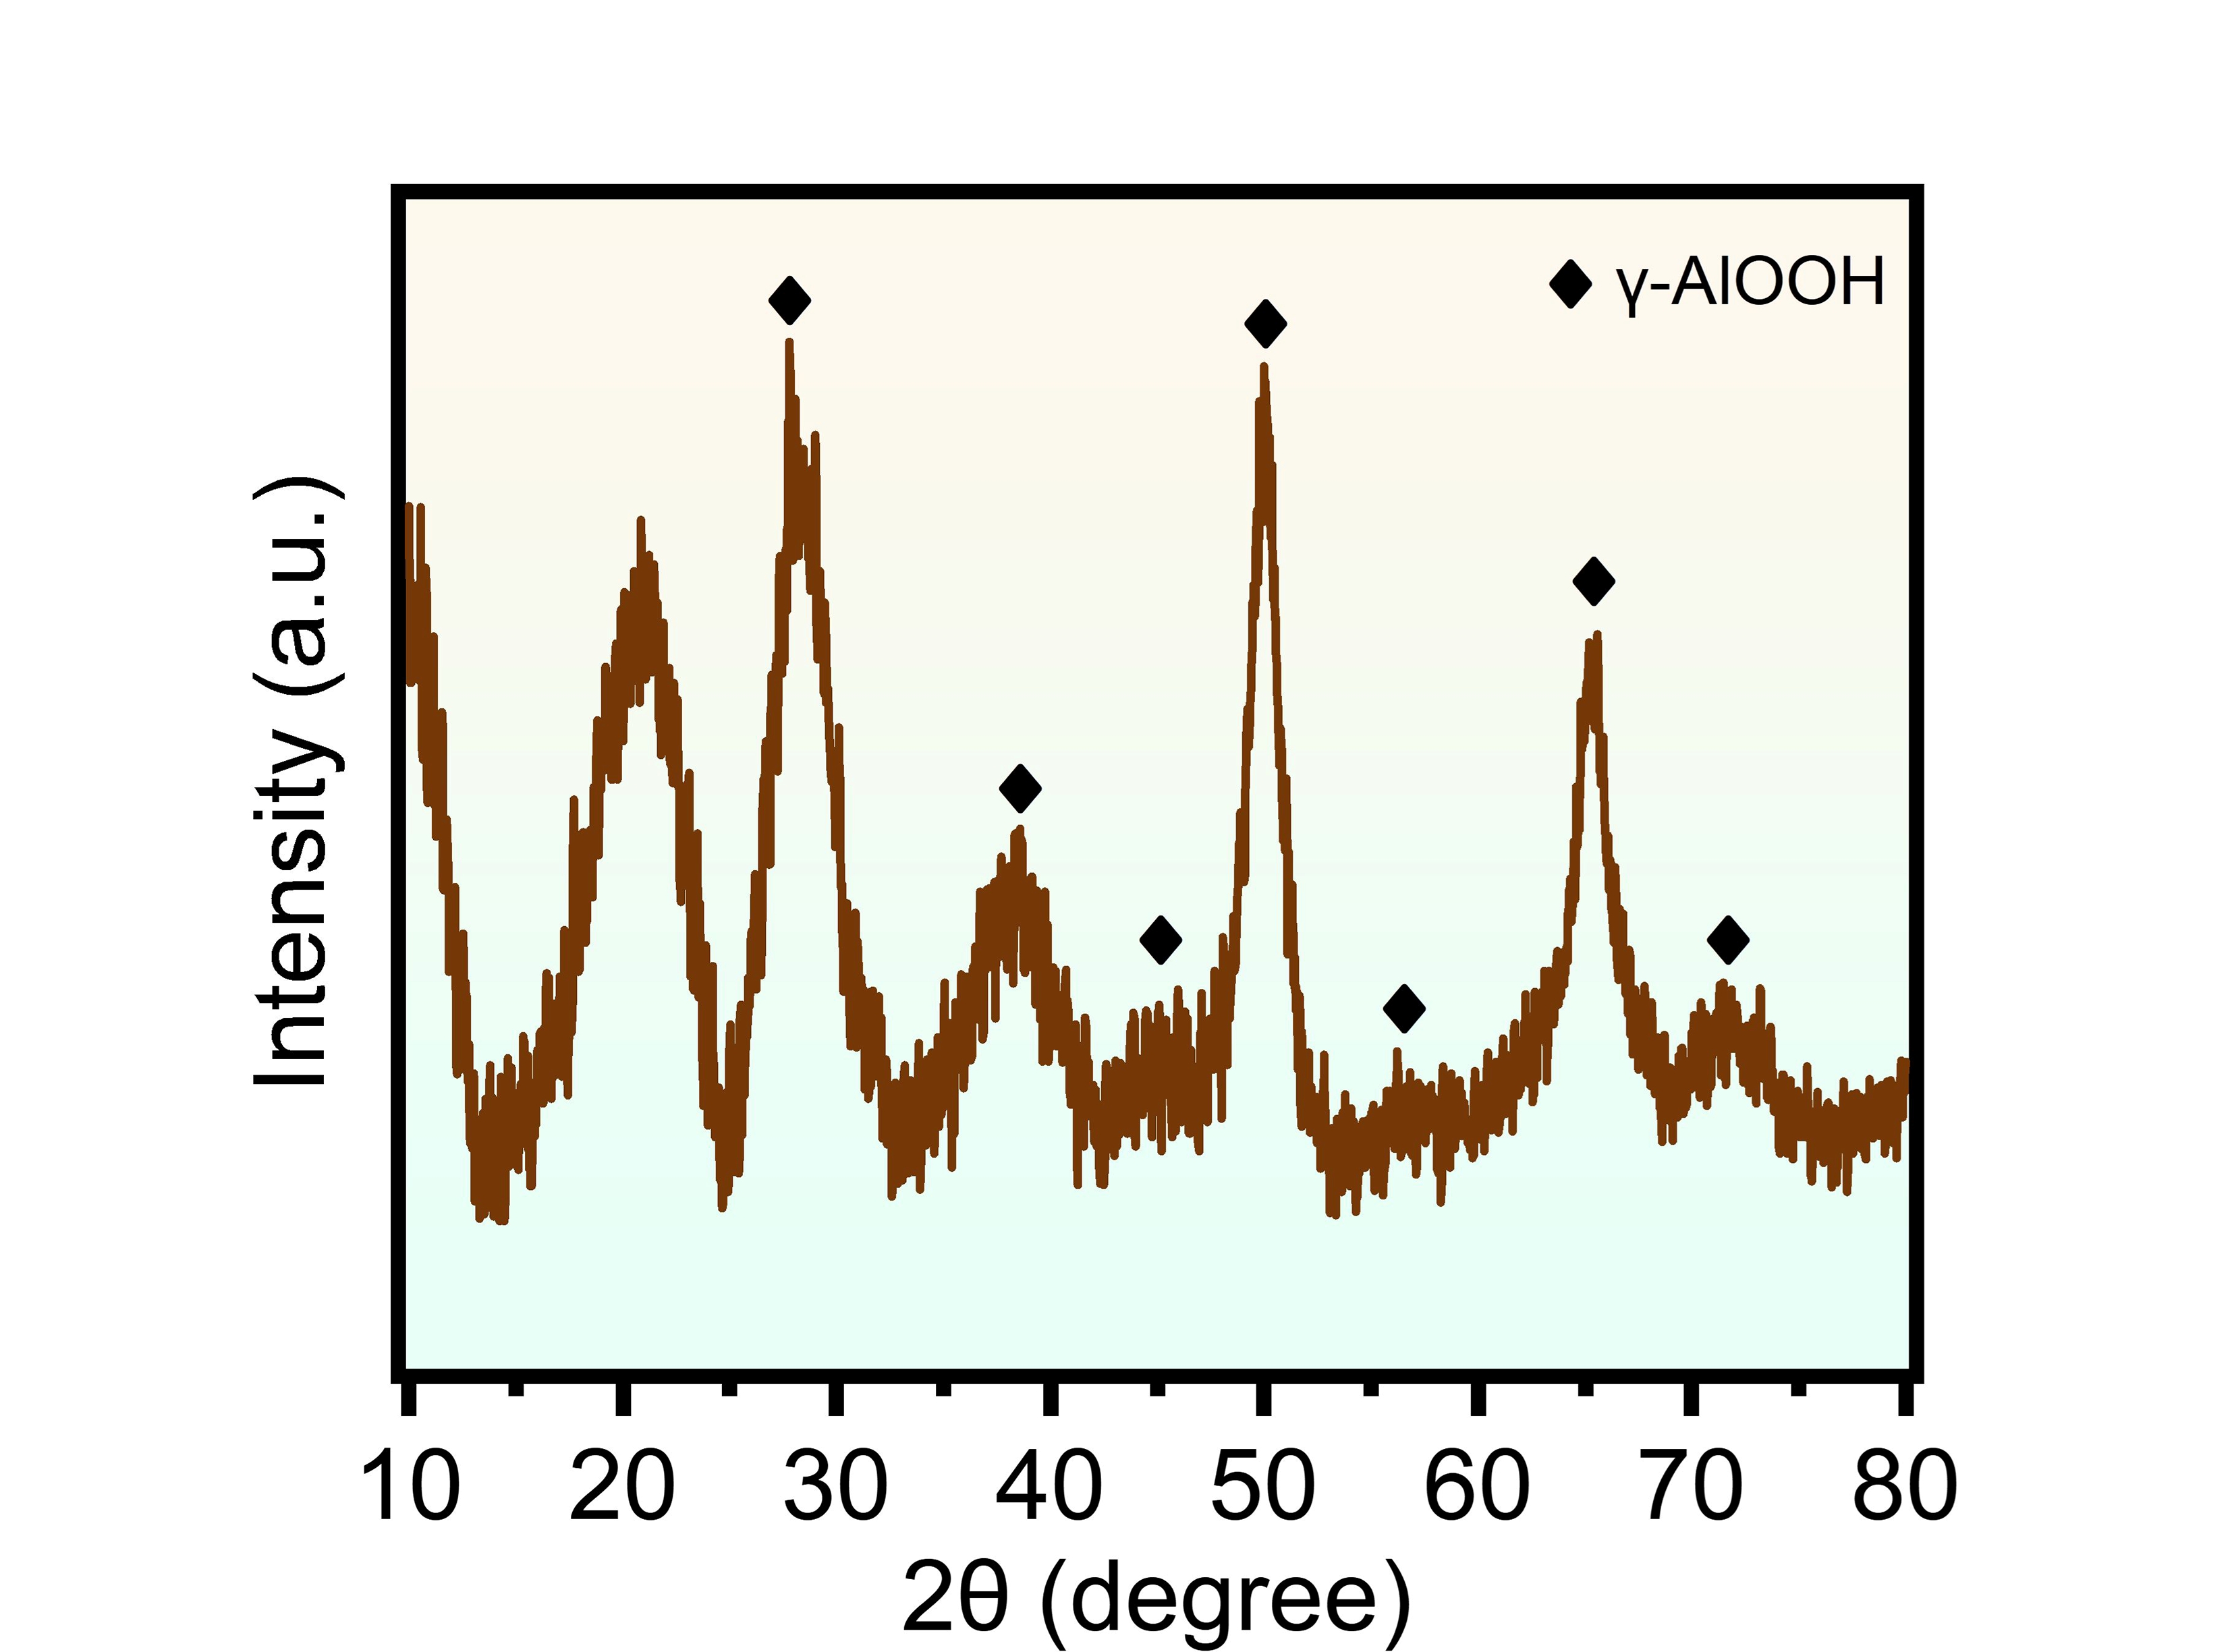


**Fig. S6** XRD pattern of Al2O3 aerogel


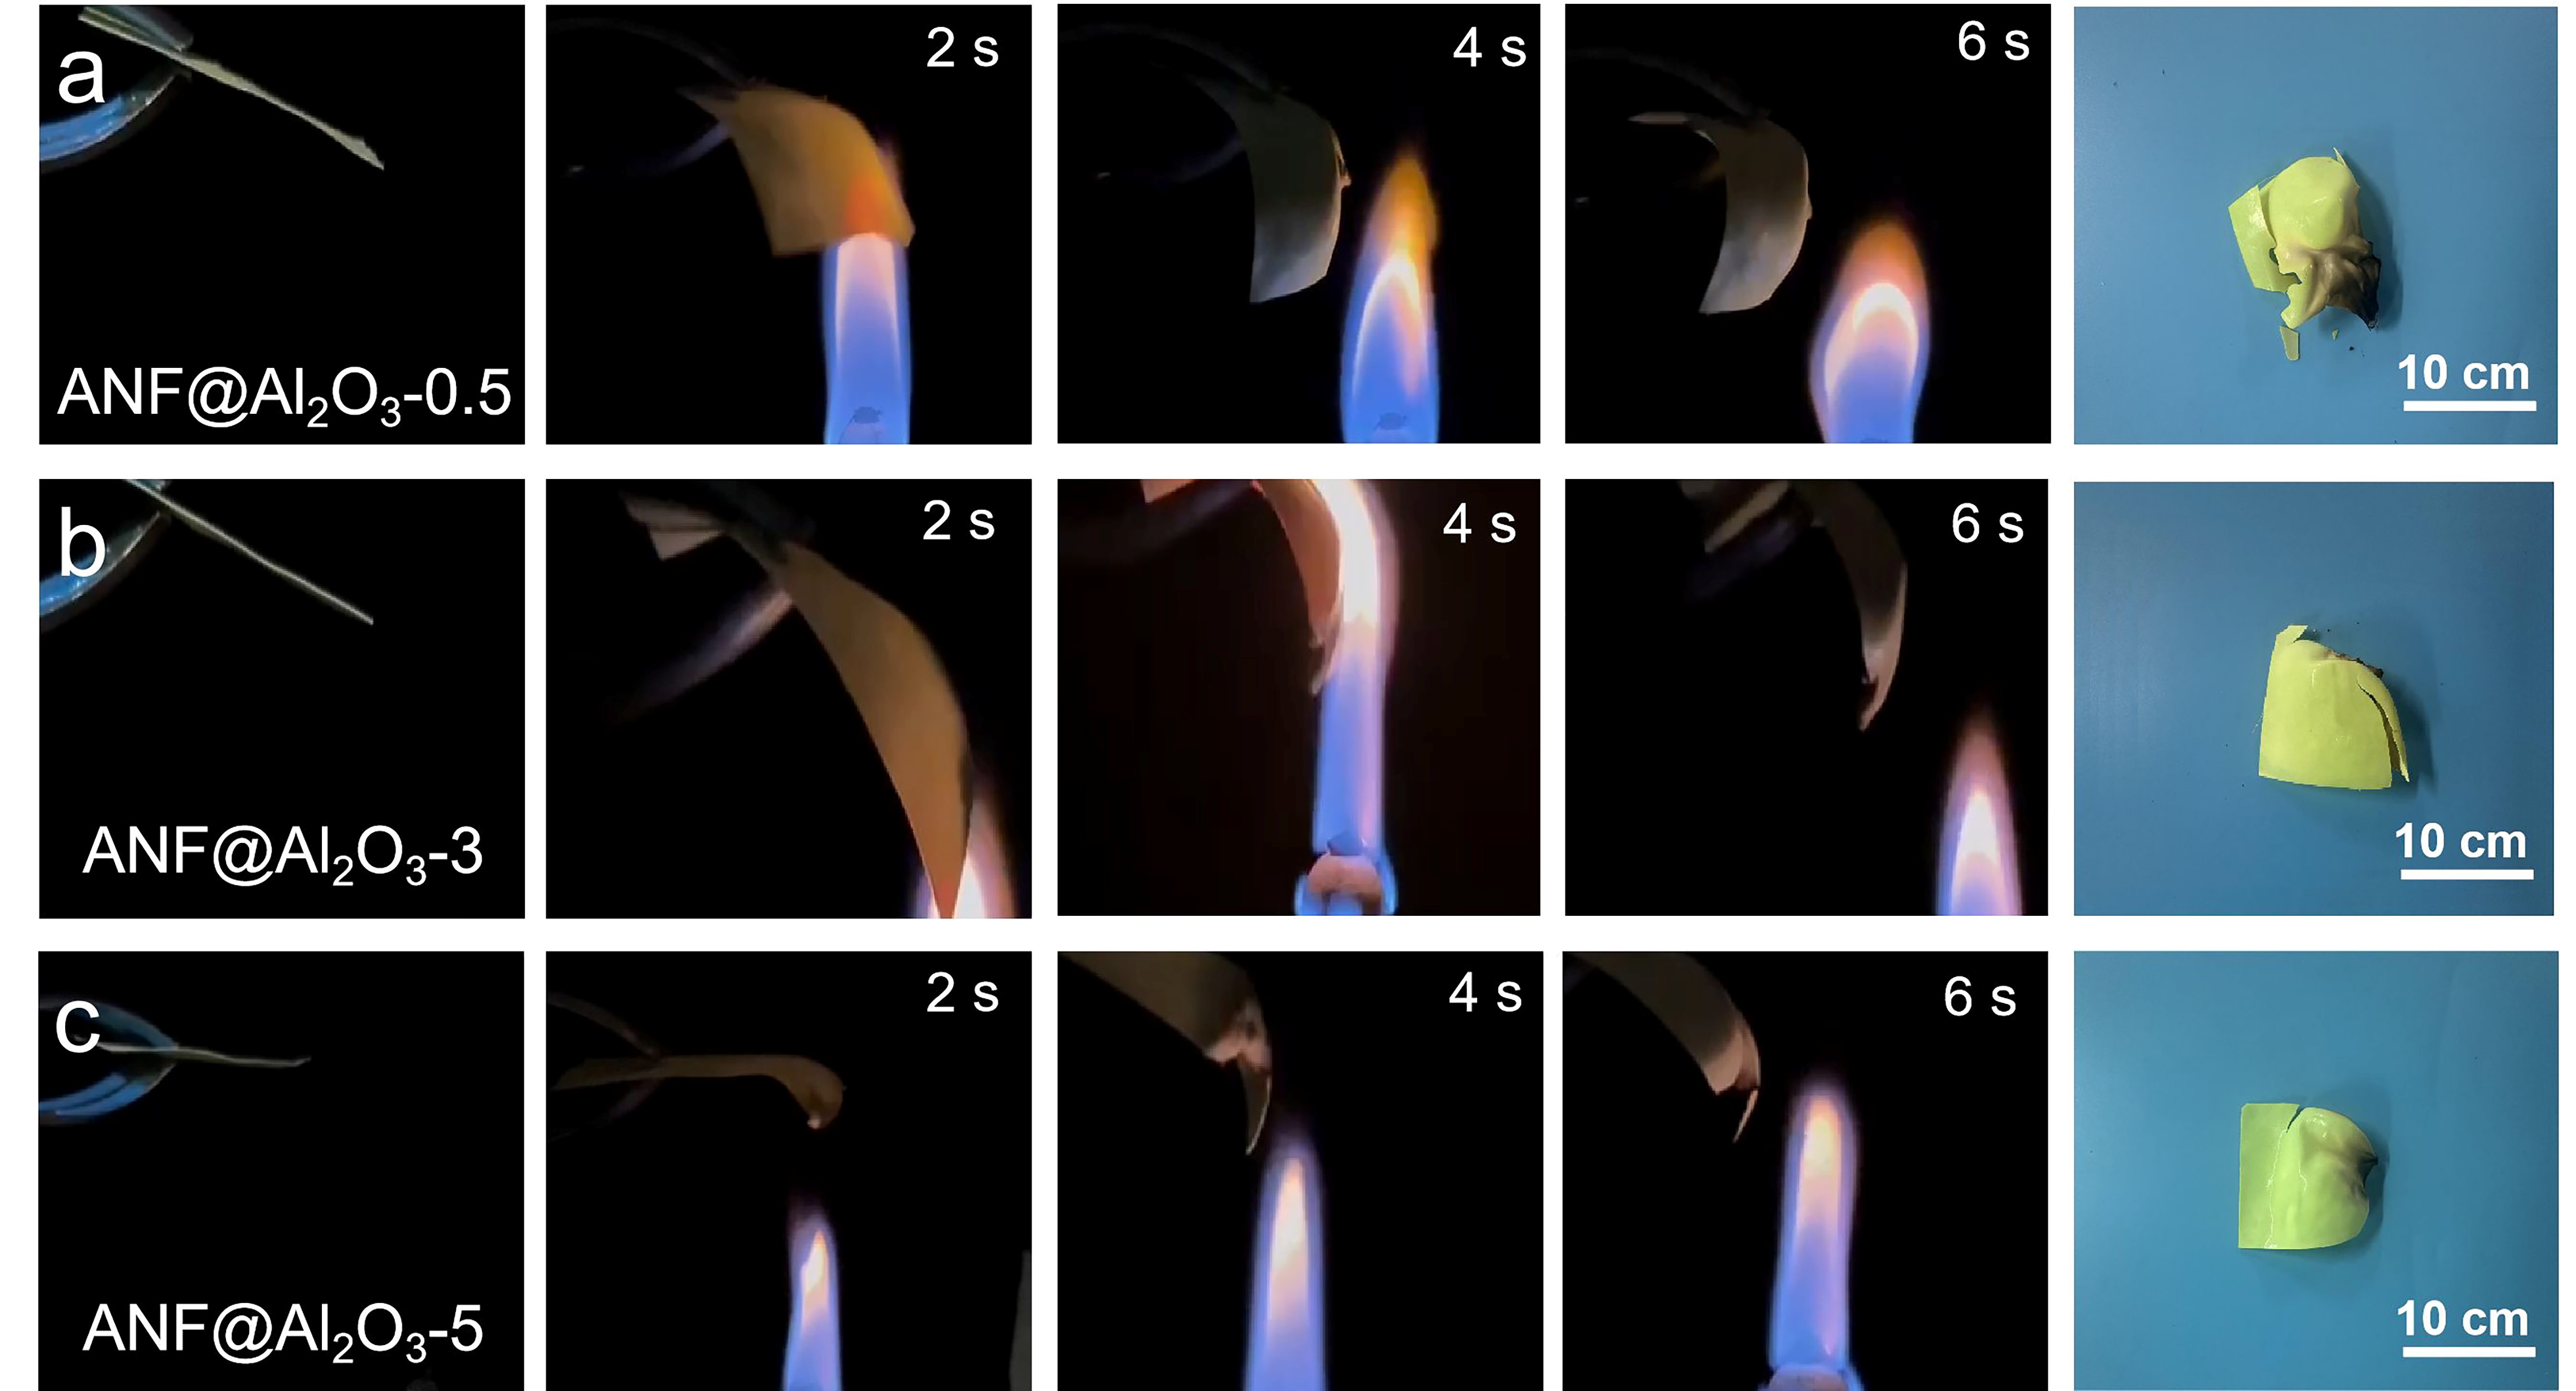


**Fig. S7** Flame resistance and post-combustion morphology of **a** [ANF@Al2O3-0.5,](mailto:ANF@Al2O3-0.5,) **b** ANF@Al2O3-3, and **c** ANF@Al2O3-5


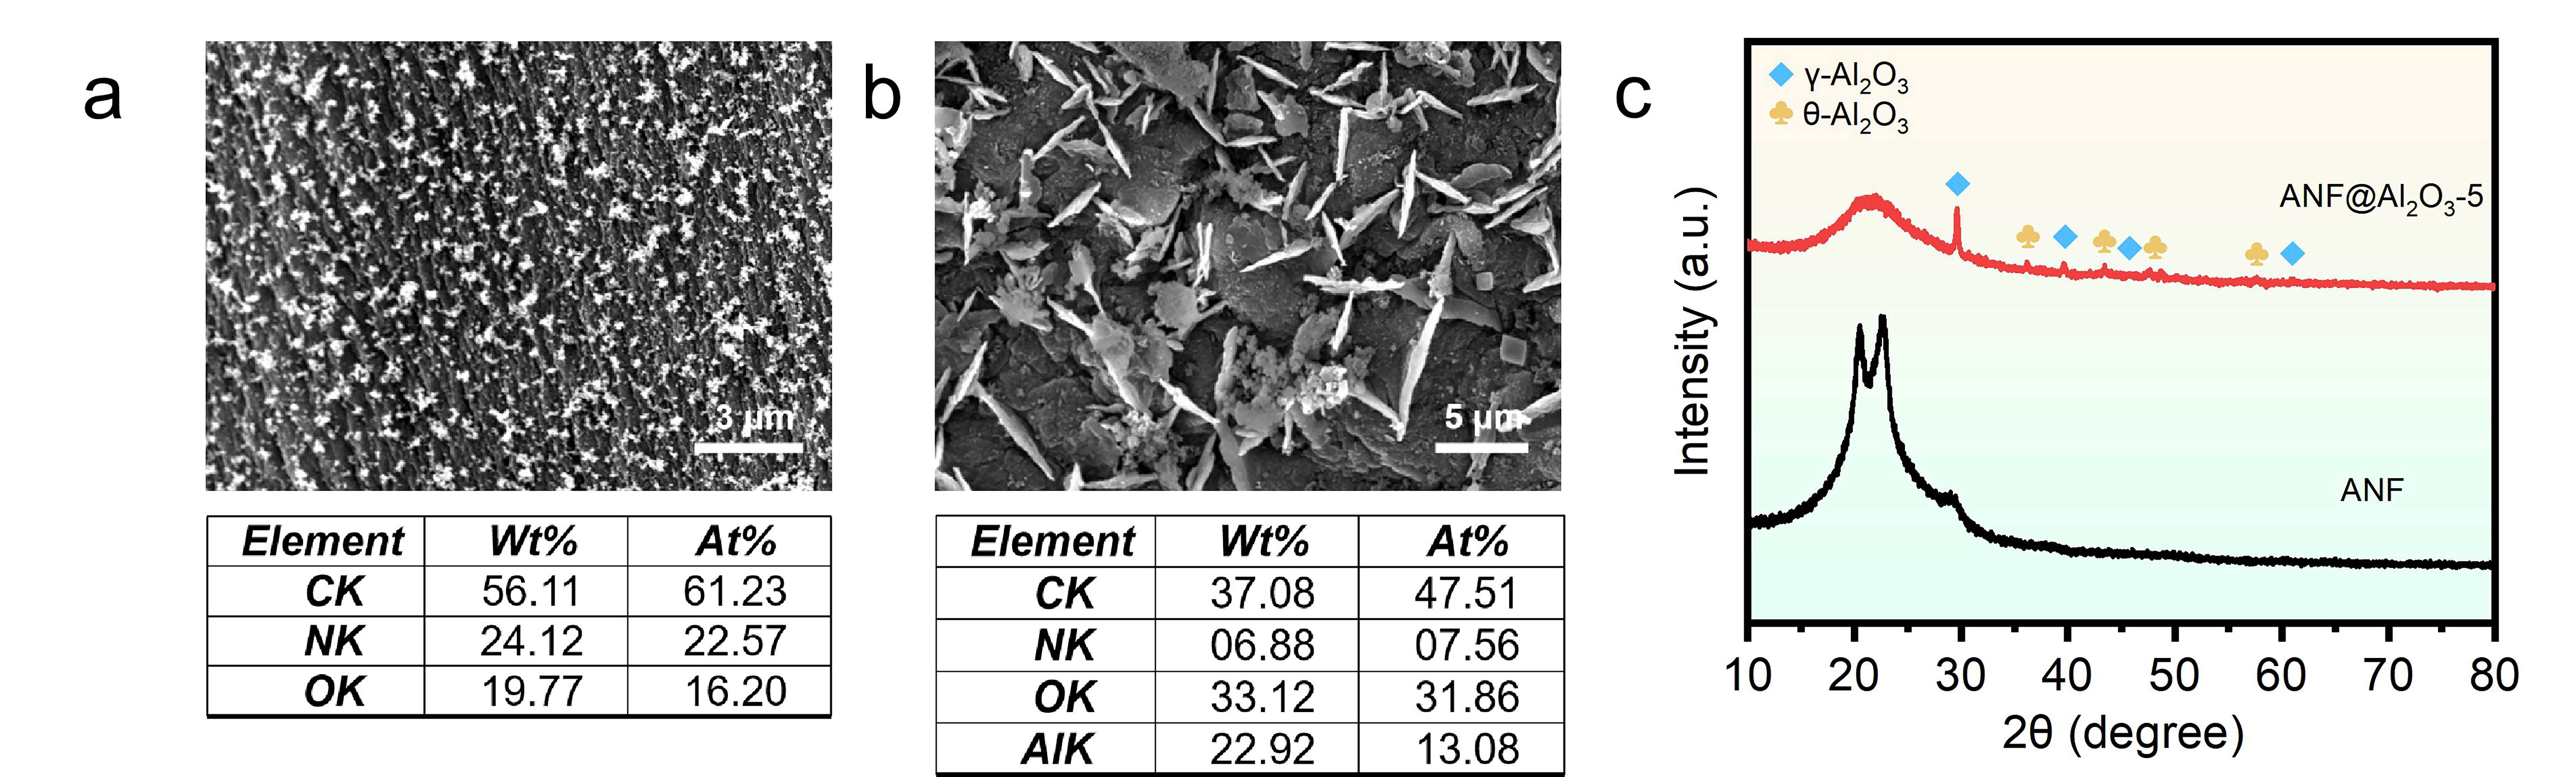


**Fig. S8** SEM images and elemental compositions of **a** ANF and **b** ANF@Al2O3-5 after heating with an alcohol lamp; **c** XRD patterns of ANF and ANF@Al2O3-5 after heating with an alcohol lamp


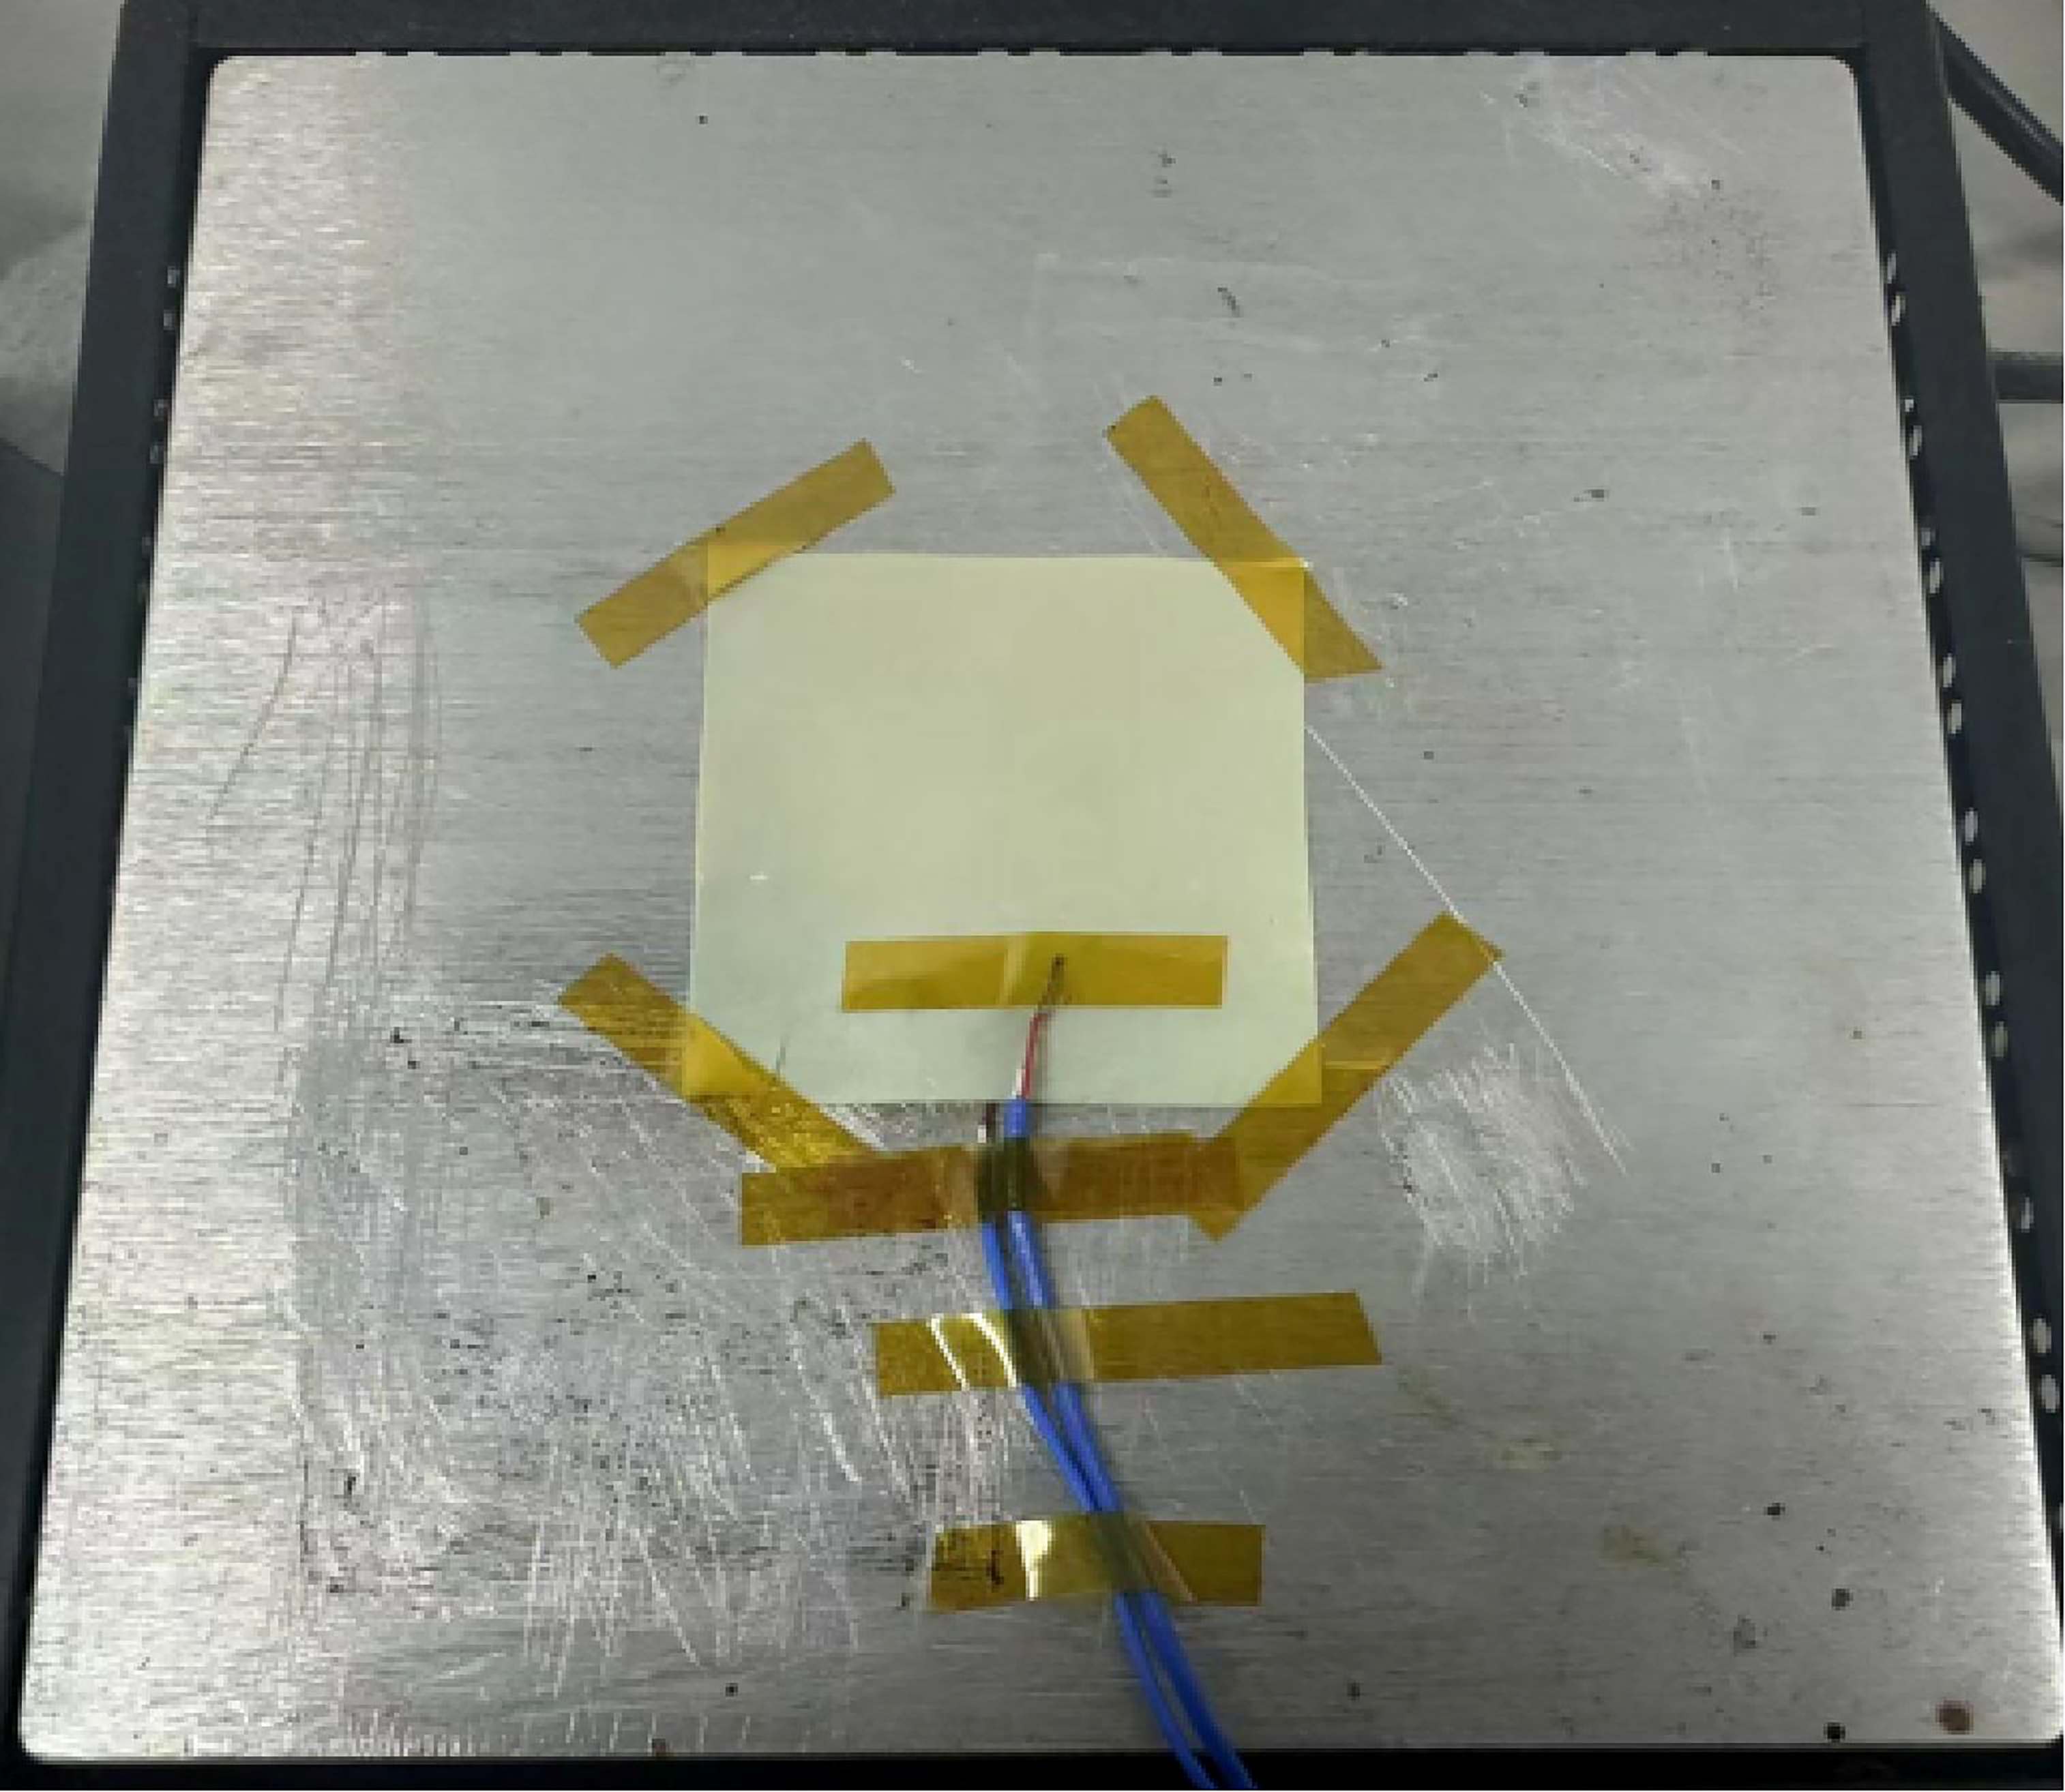


**Fig. S9** Photograph of ANF@Al2O3 placed on the heating plate


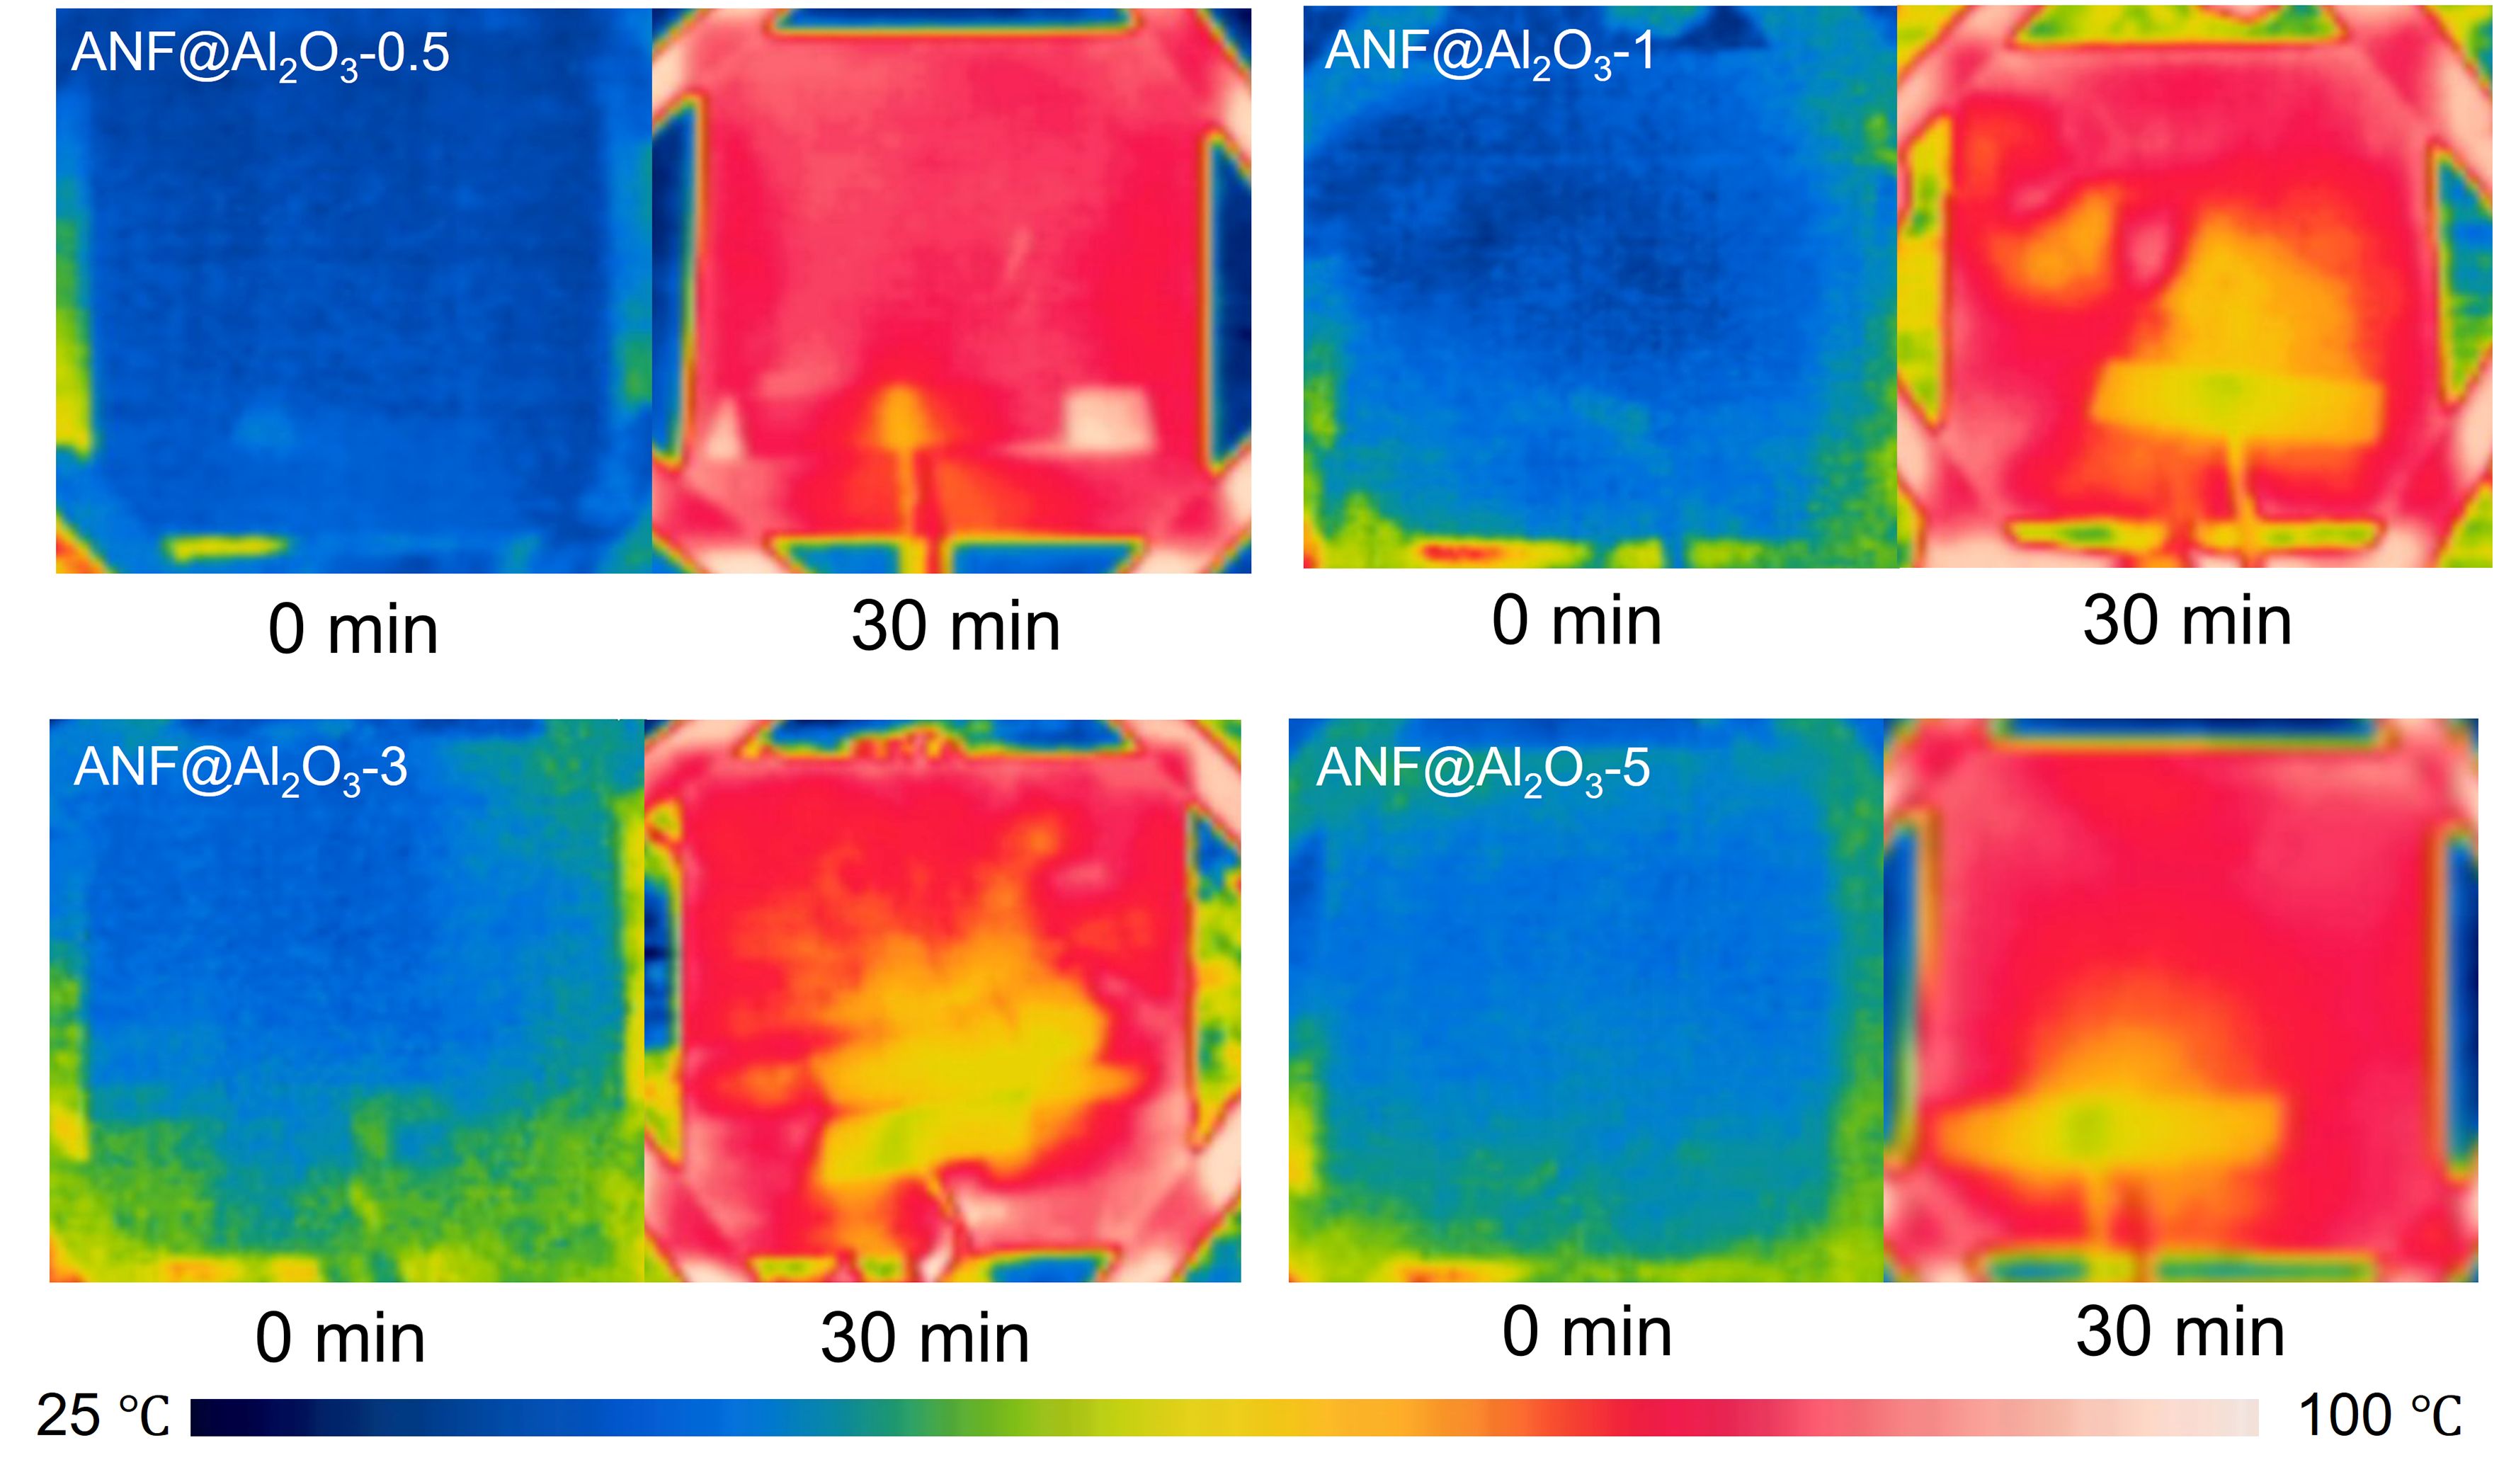


**Fig. S10** Infrared thermal images showing temperature changes of ANF@Al2O3-0.5, 1, 3, and 5 before and after 30 min of heating


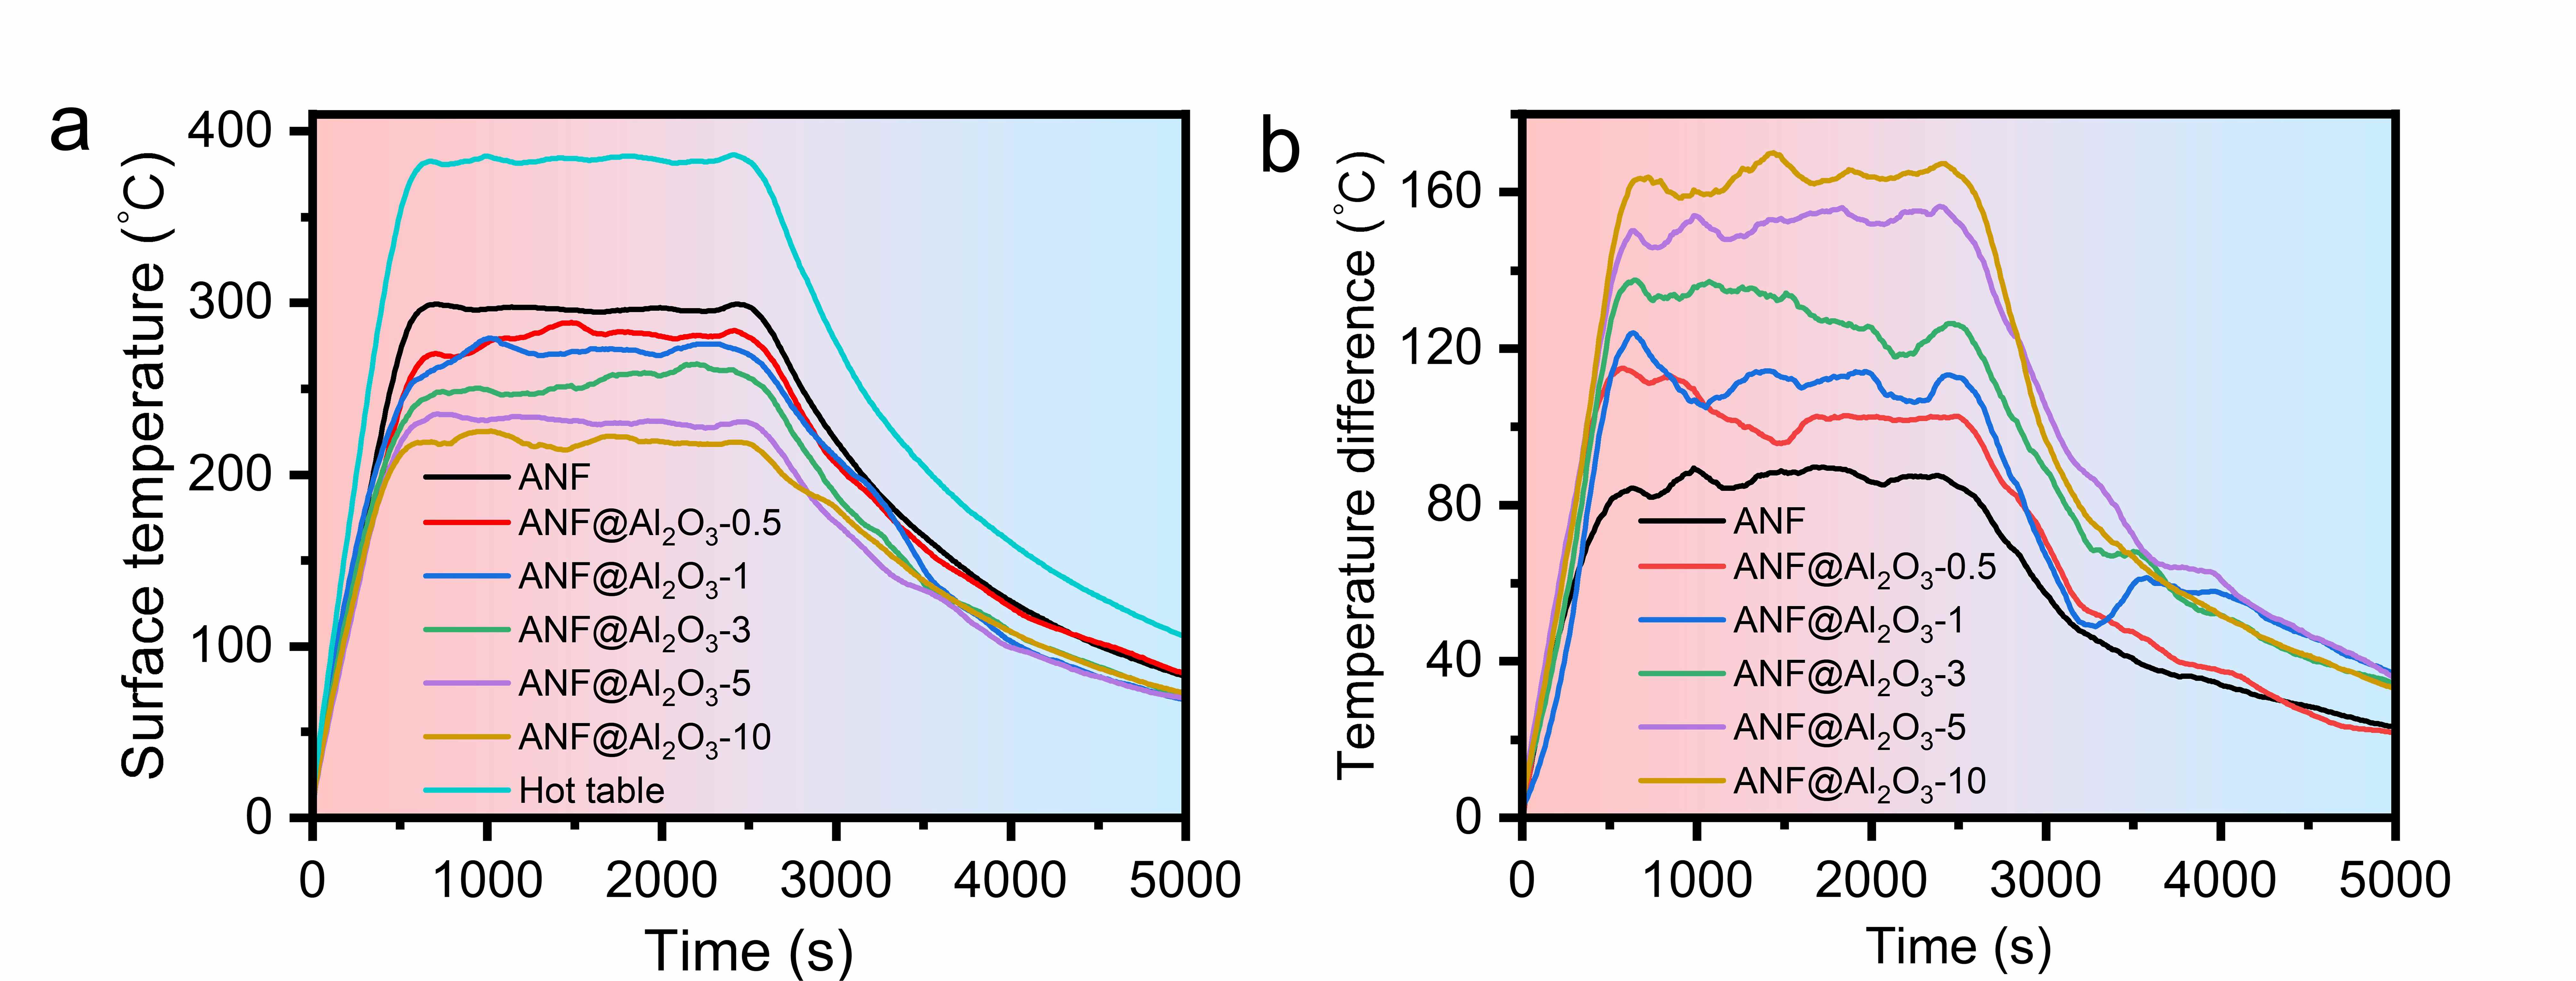


**Fig. S11** **a** Surface temperature profiles of ANF and ANF@Al2O3 aerogels during heating on a 400 °C hot plate; **b** Temperature differences between the surfaces of ANF and ANF@Al2O3 relative to the 400 °C hot plate


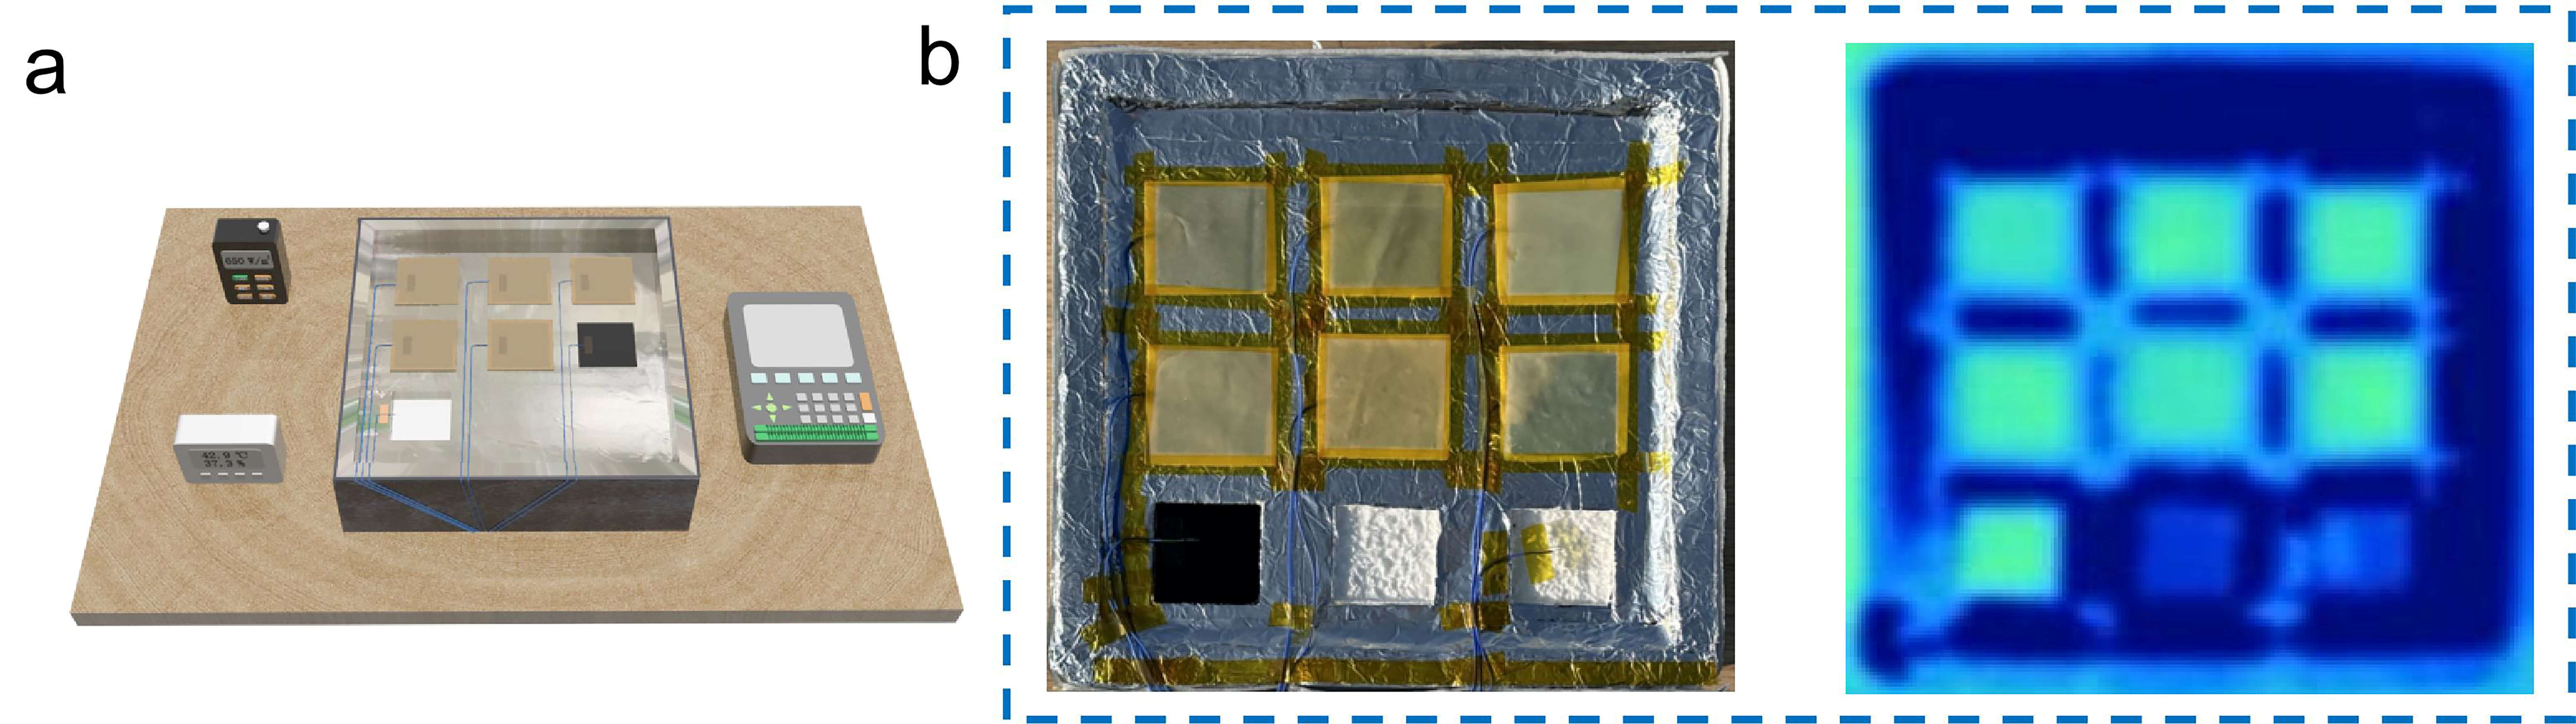


**Figure S12. a** Enlarged view of the device; **b** Photograph and infrared image during solar heating

.

**2. Supporting Table**

**Table S1** Synthesis parameters and composition of ANF@Al2O3-n aerogels

| **Samplea** | **Al sol (g)** | **ANF sol (g)** | **Mass fraction (wt.%)** |
| --- | --- | --- | --- |
| ANF | 0.000 | 40.000 | 0 |
| ANF@Al2O3-0.5 | 1.614 | 38.386 | 7.1 |
| ANF@Al2O3-1 | 3.228 | 36.772 | 8.8 |
| ANF@Al2O3-3 | 9.684 | 30.316 | 12.6 |
| ANF@Al2O3-5 | 16.140 | 23.860 | 32.0 |
| ANF@Al2O3-10 | 32.925 | 7.075 | 39.3 |

a the weight percentage of Al2O3 were calculated by the Equation:

where M indicates molecular weight and m stands for mass.

**Table S2** Specific surface area and pore structure of ANF@Al2O3-n aerogels

| **Sample** | **BET specific surface areas (m2/g)** | **BJH adsorption pore volumes (cm3/g)** | **BJH adsorption average pore diameters (nm)** | **Micropore volumes (cm3/g)** | **Micropore specific surface areas (m2/g)** |
| --- | --- | --- | --- | --- | --- |
| ANF | 392.18 | 0.97 | 18.97 | 0.013 | 38.08 |
| ANF@Al2O3-0.5 | 292.53 | 1.58 | 32.74 | 0.011 | 34.49 |
| ANF@Al2O3-1 | 279.85 | 0.73 | 18.28 | 0.006 | 23.56 |
| ANF@Al2O3-3 | 278.97 | 0.56 | 15.41 | 0.008 | 22.02 |
| ANF@Al2O3-5 | 245.79 | 0.47 | 15.69 | 0.006 | 19.95 |
| ANF@Al2O3-10 | 178.10 | 0.34 | 16.37 | 0.005 | 16.18 |
| Al2O3 | 393.09 | 3.55 | 3.054 | 3.065 | - |

**Table S3** Elemental composition of ANF@Al2O3-n aerogels

| **Sample** | **Wt%** | | | | | |
| --- | --- | --- | --- | --- | --- | --- |
| **C** | **N** | **O** | **Al** | **Cl** | **Ca** |
| ANF | 59.63 | 13.29 | 10.89 | 0.00 | 11.38 | 4.80 |
| ANF@Al2O3-0.5 | 55.14 | 14.11 | 18.13 | 1.37 | 3.60 | 7.64 |
| ANF@Al2O3-1 | 42.45 | 14.59 | 14.91 | 2.14 | 8.38 | 17.52 |
| ANF@Al2O3-3 | 46.98 | 8.72 | 17.39 | 5.27 | 7.91 | 13.73 |
| ANF@Al2O3-5 | 47.08 | 9.16 | 23.61 | 7.44 | 4.92 | 7.79 |
| ANF@Al2O3-10 | 22.05 | 8.33 | 20.78 | 17.26 | 9.43 | 22.15 |
| Al2O3 | 7.20 | 0.00 | 44.64 | 48.15 | 0.00 | 0.00 |
|  | | | | | | |
| **Sample** | **At%** | | | | | |
| **C** | **N** | **O** | **Al** | **Cl** | **Ca** |
| ANF | 70.57 | 13.49 | 9.68 | 0.00 | 4.56 | 1.70 |
| ANF@Al2O3-0.5 | 64.89 | 14.24 | 16.02 | 0.72 | 1.44 | 2.70 |
| ANF@Al2O3-1 | 56.45 | 16.63 | 14.89 | 1.27 | 3.78 | 6.98 |
| ANF@Al2O3-3 | 61.29 | 9.76 | 17.03 | 3.06 | 3.50 | 5.37 |
| ANF@Al2O3-5 | 58.88 | 9.82 | 22.16 | 4.14 | 2.09 | 2.92 |
| ANF@Al2O3-10 | 35.39 | 11.47 | 25.03 | 12.33 | 5.13 | 10.65 |
| Al2O3 | 11.59 | 0.00 | 53.92 | 34.49 | 0.00 | 0.00 |

**Table S4** Mechanical properties of ANF@Al2O3-n aerogels

| **Sample** | **Tensile elongation at break (%)** | **Tensile strength (MPa)** | **Elastic modulus (MPa)** | **Increase in elastic modulus (%)** |
| --- | --- | --- | --- | --- |
| ANF | 10.250 | 1.129 | 19.862±2.808 | 0 |
| ANF@Al2O3-0.5 | 5.460 | 1.150 | 36.316±2.080 | 82.840 |
| ANF@Al2O3-1 | 3.197 | 0.979 | 38.179±1.032 | 92.221 |
| ANF@Al2O3-3 | 1.650 | 0.690 | 41.869±3.800 | 110.799 |
| ANF@Al2O3-5 | 1.888 | 0.416 | 25.415±1.668 | 27.955 |
| ANF@Al2O3-10 | 1.102 | 0.238 | 24.088±3.141 | 20.873 |

**Table S5** Transmittance of ANF@Al2O3-n aerogels in the visible range, near-infrared range, and across the full spectral range

| **Sample** | **%T** | | |
| --- | --- | --- | --- |
| **380-780 nm** | **780-2500 nm** | **380-2500 nm** |
| ANF | 41.94 | 89.32 | 80.93 |
| ANF@Al2O3-0.5 | 33.88 | 89.27 | 78.81 |
| ANF@Al2O3-1 | 37.39 | 90.56 | 80.05 |
| ANF@Al2O3-3 | 38.11 | 89.06 | 79.34 |
| ANF@Al2O3-5 | 40.23 | 90.42 | 80.95 |
| ANF@Al2O3-10 | 34.17 | 90.77 | 80.28 |

**Table S6** The average temperature of each sample under solar heating from 10:30 to 14:00

| **Sample** | **Average temperature from 10:30 to 14:00 (℃)** |
| --- | --- |
| ANF | 41.62 |
| ANF@Al2O3-0.5 | 43.44 |
| ANF@Al2O3-1 | 43.92 |
| ANF@Al2O3-3 | 45.56 |
| ANF@Al2O3-5 | 46.62 |
| ANF@Al2O3-10 | 50.46 |
| Black glass plate | 39.14 |
| Ambient | 29.33 |

**Table S7** Density of ANF@Al2O3-n polymer solution

| **Sample** | **Polymer density (g/cm3)** |
| --- | --- |
| ANF | 1.44±0.01 |
| ANF@Al2O3-0.5 | 1.46±0.03 |
| ANF@Al2O3-1 | 1.49±0.02 |
| ANF@Al2O3-3 | 1.60±0.02 |
| ANF@Al2O3-5 | 1.73±0.03 |
| ANF@Al2O3-10 | 2.20±0.04 |
